26 **Abstract**

27 As the decline of malaria cases stalled over the last five years, novel targets in *Plasmodium*  
28 *falciparum* are necessary for the development of new drugs. Glycogen Synthase Kinase  
29 (PfGSK3) has been identified as a potential target, since its selective inhibitors were shown to  
30 disrupt the parasite`s life cycle. Here, we show that PfGSK3 exhibits autophosphorylation,  
31 leading to an extensive phosphorylation both *in vitro* and in the parasite. In the uncanonical  
32 N-terminal region of the parasite enzyme, we identified several autophosphorylation sites that  
33 regulate the activity of PfGSK3. By combining molecular modeling with experimental small-  
34 angle X-ray scattering data, we show that increased PfGSK3 activity is promoted by  
35 conformational changes in the PfGSK3 N-terminus, triggered by N-terminal phosphorylation.  
36 Our work provides novel insights into the structure and regulation of the malarial PfGSK3.

## 37 **Introduction**

38 *Plasmodium falciparum* is an intracellular eukaryotic parasite that causes the most severe  
39 form of malaria in humans, infecting over 200 million people every year (1). The emergence  
40 of malaria parasites resistant to all currently used antimalarial drugs imposes a serious threat  
41 to public health (2). Identification of new drug targets and drugs is therefore crucial for future  
42 handling of the malaria pandemics. Kinases comprise up to 10% of all drug targets (3) and a  
43 number of potent inhibitors were discovered that are directed against *P. falciparum* kinases,  
44 such as glycogen synthase kinase 3 (PfGSK3) (4). Human GSK3 $\beta$  plays a crucial role in a  
45 number of signaling processes, regulating glycogen metabolism (5–7), cell cycle and growth  
46 (8–10), translation (7), embryonic development (9, 11) or differentiation of neurons (12–16).  
47 Consequently, the inhibitors of GSK3 are investigated as potential treatment options for  
48 neurodegenerative and psychiatric diseases (17–23) and its structure, catalytic mechanism  
49 and regulation are well studied (24–26). GSK3 $\beta$  is thought to be constitutively activated by  
50 autophosphorylation at Y216 (27–29) and inactivated by phosphorylation of N-terminal S9  
51 mediated by several protein kinases, such as PKA and PKB (6, 30). The inactivation is  
52 achieved as the phosphorylated S9 enables binding of GSK3 N-terminus to a pocket for a  
53 priming phosphorylation in the substrate-binding region and thus reduces the binding affinity  
54 for substrates (24, 25).

55 In *P. falciparum*, two genes are encoding GSK3 (PF3D7\_0312400 and PF3D7\_1316000) and  
56 these enzymes are much less understood in their physiological role and in the molecular  
57 mechanism. GSK3 $\beta$  (PF3D7\_0312400, further as PfGSK3) is the only isoform that is  
58 expressed in blood stages (31) of the parasite and is involved in the regulation of red blood  
59 cell invasion (32). The invasion process is an essential, parasite-driven event that relies on  
60 the orchestrated interplay of multiple protein-protein interactions (33). It requires the apical  
61 membrane antigen 1 (AMA1), a type I transmembrane protein located in the micronemes of  
62 the parasite and translocated on its surface before the host cell entry (32, 34–39). The  
63 N-terminal ectodomain of AMA1 interacts with the rhoptry neck (RON) protein complex of the

64 parasite, that is inserted into the membrane of the red blood cell, forming the basis of the so  
65 called “tight junction” between the membrane of the invading parasite and its target cell (40–  
66 44). The short C-terminus of AMA1 locates inside the parasite and thus, is amenable to  
67 regulation by phosphorylation (45, 46). In a two-step phosphorylation event, protein kinase A  
68 (PfPKA) first phosphorylates S610 of AMA1 (45, 47, 48), which in turn enables subsequent  
69 phosphorylation of AMA1 residue T613 by PfGSK3 (32). Thus, PfGSK3 serves as a secondary  
70 kinase, although both phosphorylation sites are equally important for AMA1 function and *P.*  
71 *falciparum* invasion (32). PfGSK3 inhibitors, built on a thieno[2,3-b]pyridine or benzofuran  
72 scaffold, have been developed that display selective antiplasmodial activity with IC<sub>50</sub> values in  
73 the low micromolar to sub-micromolar range (49–51) and one of these inhibitors has been  
74 shown to abrogate the red blood cell invasion (32). Further improvements of these inhibitors  
75 could be guided by a three-dimensional structure of PfGSK3 that has, however, not been  
76 determined so far.

77 Based on sequence homology across GSK3 proteins, PfGSK3 consists of two conserved  
78 structural domains: a  $\beta$ -sheet-rich lobe with an ATP binding pocket and an  $\alpha$ -helical lobe with  
79 the activation loop and a substrate binding site. These domains are typically preceded by an  
80 N-terminal domain that is predicted to be disordered (25). In PfGSK3, the important residues  
81 in the ATP binding pocket and in the activation loop remain conserved, however, its  
82 N-terminus displays a unique extension and its function remains unknown (52).

83 To analyze this in more detail, we optimized the purification protocol of PfGSK3 that enabled  
84 us to perform thorough structural and functional characterization of the protein *in vitro*. We  
85 show evidence that PfGSK3 exhibits autophosphorylation of the N-terminal and activation loop  
86 residues *in vitro* and validated these phosphorylation sites *in vivo*. Phosphorylation of the  
87 N-terminal residues induces conformational changes of the protein that lead to an increase in  
88 the enzymatic activity of PfGSK3, providing a new regulatory mechanism.

## 89 **Results**

### 90 **High yield expression and purification of enzymatically active PfGSK3 from *E. coli***

91 To obtain recombinant PfGSK3 in high purity and homogeneity that allow functional and  
92 structural analysis, we extended the previously established PfGSK3 expression and  
93 purification protocols (32, 49, 50, 53). In short, N-terminally hexahistidine-tagged PfGSK3 (Fig.  
94 1A) was separated from the bacterial cell lysate by immobilized metal affinity chromatography  
95 (IMAC, Fig. 1B) and subsequent size exclusion chromatography (SEC, Fig. 1C). We  
96 deliberately excluded a negative IMAC step as PfGSK3 becomes sensitive to NiNTA beads  
97 upon the removal of the histidine tag and has a high tendency to precipitate. Instead, to remove  
98 the impurities, we included an additional ion exchange chromatography (IEC) step (Fig. 1D).  
99 This yields the desired level of purity of PfGSK3 as judged by SDS-PAGE, but the protein  
100 elutes in several partially overlapping peaks with increasing concentration of sodium chloride.  
101 Such heterogeneity of PfGSK3 might be caused by different posttranslational modifications.  
102 To assess the quality of the purified protein and to characterize it further, we applied several  
103 biophysical methods. Dynamic light scattering data confirm high homogeneity of the sample  
104 with a calculated molecular weight of 52 kDa, in agreement with the expected mass for a  
105 monomer of recombinant PfGSK3 (52.05 kDa, Fig. S2A). The secondary structure content  
106 derived from circular dichroism data is 22%  $\alpha$  helix, 26%  $\beta$  sheet, 24% turns and 28% disorder.  
107 This corresponds to a typical domain organization of homologous GSK3 proteins (such as  
108 human GSK3 $\beta$ ) with an N-terminal  $\beta$ -sheet-rich domain and an  $\alpha$ -helical C-terminal domain  
109 that are flanked by disordered N-terminal and C-terminal regions (Fig. S1A, Fig. 2A) (24, 54).  
110 To verify that the protein retains its three-dimensional structure and kinase properties, we  
111 tested whether its thermal stability changes in the presence of ATP and ATP analogs. Indeed,  
112 the stability of PfGSK3 markedly increased in a concentration dependent manner from 45°C  
113 to over 50°C with increasing concentration of dATP or ATP (Fig. 2B and Fig. S2B). Moreover,  
114 the protein could also be stabilized by several non-hydrolysable ATP analogs (Fig. S2C).  
115 Additionally, we observed a concentration-dependent increase of the thermal stability of

116 PfGSK3 with increasing concentrations of sulfate ions (Fig. S2D-E). Sulfate ions are bound in  
117 the activation loop of several human GSK3 structures (55–61), suggesting that the structural  
118 elements in this region are also conserved. Finally, we measured the PfGSK3 activity with a  
119 luciferase assay, using a peptide derived from human glycogen synthase 1 (GS-1) as a  
120 substrate, resulting in a catalytic rate constant of  $k_{cat} = 9.5 \text{ s}^{-1}$ , which is in a similar range as  
121 previously reported (between 0.7 and 3.7  $\text{s}^{-1}$ ) for human GSK3 (Fig. 2C, Fig. S2F) (54). Thus,  
122 purified PfGSK3 is folded, stable, enzymatically active and retains the structure that is  
123 expected to be similar to human GSK3.

#### 124 **Divalent ions of heavy metals induce reversible formation of PfGSK3 oligomers**

125 The observation that PfGSK3 after affinity tag cleavage has a strong tendency to precipitate  
126 upon interaction with NiNTA beads prompted us to investigate the impact of various heavy  
127 metals on PfGSK3. To this end, we measured the thermal unfolding profiles of the protein in  
128 the presence of different metal ions. Under standard conditions, PfGSK3 displays a clear  
129 transition midpoint at 45°C. However, in the presence of divalent ions, such as zinc, cobalt,  
130 nickel and copper cations, the typical unfolding transition profiles completely disappear,  
131 indicating structural changes (Fig. S3A). We selected zinc to investigate further the effect of  
132 divalent heavy metal ions on PfGSK3 because it showed the most pronounced effect on  
133 PfGSK3 unfolding. Interestingly, the secondary structure content measured by circular  
134 dichroism did not notably change upon addition of zinc, demonstrating that the secondary  
135 structural elements of the protein remain folded (Fig. S3C). However, analytical size exclusion  
136 chromatography revealed that the zinc cations induce the formation of high molecular weight  
137 (high-MW) protein species that elute earlier from the column than the metal-free protein (Fig.  
138 3A) and this effect is dependent on the concentration of the zinc cations (Fig. S3B). Indeed,  
139 in a cross-linking experiment with glutaraldehyde, the high-MW species appear predominantly  
140 in the presence of zinc (Fig. S3D). The high-MW species can revert to monomers by the  
141 addition of the divalent metal chelator EDTA (Fig. 3A). To study the impact of heavy metals  
142 on the PfGSK3 function, we measured its activity in presence of zinc at different

143 concentrations. The metal cations cause a dramatic decrease in the PfGSK3 activity (Fig. 3B).  
144 However, the activity is completely restored after EDTA treatment. Finally, we used  
145 small-angle X-ray scattering (SAXS, Fig. 3C and Fig. S3E) and negative stain EM (Fig. S3F)  
146 to characterize the high-MW species. The distance distribution derived from the SAXS data  
147 demonstrates high anisometry of the particles (peaking at 20 nm but with  $D_{max}=90$  nm). In  
148 agreement, the cross-linked high-MW species visualized by negative stain EM vary in their  
149 shape and size (Fig. S3F). In summary, heavy metal ions, such as zinc cations, induce a  
150 reversible formation of large PfGSK3 particles. While the protein maintains its secondary  
151 structure, it completely loses its enzymatic activity. Importantly, the process is reversible and  
152 the restored PfGSK3 monomers fully regain their kinase activity.

### 153 **PfGSK3 exhibits autophosphorylation**

154 PfGSK3 elutes from the IEX chromatography column in at least four different species with  
155 distinct elution volumes that are of comparable purity (Fig. 1D). Such behavior could be  
156 explained by a heterogeneous phosphorylation pattern. To investigate this possibility, we  
157 separately analyzed the four top peak fractions (F1-F4) from the IEX elution profile of the wild  
158 type PfGSK3 preparation (Fig. 1D). SDS-PAGE stained with the Pro-Q Diamond stain, which  
159 specifically binds to phosphorylated proteins, shows that the amount of total phosphorylation  
160 increases towards later elution volumes (Fig. S4A). Mass spectrometry analysis revealed that  
161 the protein is partially phosphorylated at multiple sites. We identified a number of  
162 phosphorylated residues at the N-terminus (residues 13-62, see Fig. S4B). Additionally,  
163 several residues in the activation loop, primarily S226 and Y229, but also S228 and S232 were  
164 found to be phosphorylated (Fig. S4B). The phosphorylation of the activation loop residues  
165 and two N-terminal serine residues (S31, S62) is in agreement with the previously identified  
166 phosphorylation sites in *P. falciparum* blood-stage parasites (37–39, 62–65), while the  
167 phosphorylation of other N-terminal residues, predominantly Y39, S40, S42 and S43, has not  
168 been detected in parasite lysate-based phospho-fingerprinting. As the *E. coli* expression  
169 system only possesses a limited capacity to phosphorylate proteins (66–68), we tested the

170 ability of PfGSK3 to exhibit autophosphorylation by incubating recombinant protein with  
171 ATP/MgCl<sub>2</sub> and subsequent analysis of the ion exchange chromatography profiles. Indeed,  
172 the treatment with ATP/MgCl<sub>2</sub> led to a drop in the fluorescence signal from the earlier eluting  
173 peaks and gain in the fluorescence signal from later eluting peaks, indicating that PfGSK3 is  
174 able to exhibit autophosphorylation *in vitro* (Fig. 4A). In addition, we employed the luciferase  
175 activity assay to examine PfGSK3 activity in the absence of a substrate peptide. The assay  
176 showed the consumption of ATP even in the absence of the substrate peptide that was  
177 dependent on the concentration of PfGSK3, confirming that PfGSK3 exhibits  
178 autophosphorylation (Fig. 4B).

### 179 **The N-terminus of endogenous PfGSK3 is phosphorylated**

180 Having observed autophosphorylation of PfGSK3 *in vitro*, we also investigated the  
181 phosphorylation state of PfGSK3 expressed in the parasite. To this end, we made use of a  
182 *P. falciparum* cell line endogenously expressing C-terminally GFP-tagged GSK3 (GSK3-GFP,  
183 Fig. S5). The parasites were harvested at the schizont stage and GSK3-GFP was purified  
184 using GFP Trap agarose beads (Fig. 5A) and subjected to mass spectrometry analysis. The  
185 identified peptides exhibited phosphorylation both at the N-terminus and in the activation loop,  
186 similarly to recombinantly expressed PfGSK3 (Fig. 5B). The generally low Mascot Delta Score  
187 (69) did not allow us to confidently pinpoint the exact phosphorylation sites, but confirmed that  
188 a significant portion of the residues on the peptide derived from the unstructured N-terminus  
189 were phosphorylated (average 28%, residues 39-43) compared to the activation loop peptides  
190 (average 5%, residues 226-233). These data attest that N-terminal phosphorylation of PfGSK3  
191 also occurs *in vivo*.

### 192 **N-terminal domain is indispensable for PfGSK3 stability**

193 To investigate the role of phosphorylation in PfGSK3 further, we attempted to express inactive  
194 mutants to prevent autophosphorylation. Therefore, we changed the essential residue in the  
195 ATP binding pocket K96 or residues from the activation loop S226 and Y229 to alanine. The



196 small-scale expression screen showed that the inactive mutants of PfGSK3 did not express in  
197 a soluble form but instead formed inclusion bodies (Fig. 6A). We then isolated the inclusion  
198 bodies of the PfGSK3<sup>K96A</sup> and PfGSK3<sup>S226A/Y229A</sup> mutants and examined their phosphorylation  
199 states by mass spectrometry. These mutants display the full length sequence but are devoid  
200 of any phosphorylation (K96A) or exhibit markedly reduced phosphorylation (S226A/Y229A)  
201 compared to the wild-type protein (Fig. 6C). This indicates that these mutations either impair  
202 PfGSK3 function or PfGSK3 phosphorylation is crucial for folding and solubility. The latter is  
203 further supported by a co-expression experiment of wild-type PfGSK3 with the  
204 dephosphorylating lambda phosphatase, which results in insoluble material only (Fig. S6C).  
205 As we found the N-terminal extension of PfGSK3 to carry several phosphorylation sites, we  
206 cloned a series of N-terminally truncated protein constructs (Fig. S1A). None of these  
207 constructs expressed in a soluble form (Fig. 6B) and mass spectrometry confirmed a complete  
208 lack of phosphorylation in the PfGSK3 activation loop ( $\Delta$ N64 in Fig. 6C). Expression tests at  
209 different temperatures indicate that not only the aforementioned mutants and constructs, but  
210 also wild-type PfGSK3 is less expressed and mainly insoluble at lower temperatures. In fact,  
211 constructs with truncated N-termini did not express at 18°C at all, and even the wild-type  
212 protein forms only inclusion bodies under such experimental settings (Fig. S6A-B). These data  
213 further stress the crucial role of the PfGSK3 N-terminus as well as its phosphorylation sites for  
214 folding and function of PfGSK3. As the N-terminally truncated PfGSK3 constructs are devoid  
215 of any phosphorylation, we propose that the N-terminal PfGSK3 domain, unique for  
216 *Plasmodium* species, is essential for PfGSK3 stability.

217

### 218 **N-terminal phosphorylation fine-tunes the activity of PfGSK3**

219 Provided that the PfGSK3 N-terminus is indispensable for its function, we suspected that this  
220 region could also be a potential site of PfGSK3 regulation, as it is in human GSK3 $\beta$ . Therefore,  
221 we analyzed the individual separated fractions from IEX chromatography (Fig. 1D) by  
222 LC/MS-MS. Here, we observed that the extent of phosphorylation of residues in the activation

223 loop of PfGSK3 is comparable between the four fractions, but large differences in the  
224 N-terminal phosphorylation patterns are obvious (Fig. 7A). Specifically, all N-terminal residues  
225 are significantly less phosphorylated in the first fraction (F1), while in the second fraction (F2),  
226 the extend of phosphorylation of residues Y39 and S40 is strongly increased and the third and  
227 fourth fractions (F3 and F4) have generally higher level of N-terminal phosphorylation, which  
228 is most pronounced on residues Y39, S40, S42 and S43. Of note, only residue S40 is well  
229 conserved across *Plasmodium* species, but all other *Plasmodium* species contain multiple  
230 non-conserved N-terminal residues that are potential phosphorylation sites (Fig. S7A, F). To  
231 assess the relationship between the activity of PfGSK3 and its phosphorylation pattern, we  
232 made use of the differences in N-terminal phosphorylation between the individual IEX fractions  
233 and measured their kinase activity separately (Fig. 7B). PfGSK3 activity rises with an increase  
234 in N-terminal phosphorylation levels (from F1 to F4), supporting that phosphorylation is crucial  
235 for activity. Phosphorylation levels of residues S40, S42 and S43 significantly correlate with  
236 the PfGSK3 activity (Pearson R=0.6, p<0.05 in all cases, Fig. 7C-E), while this correlation is  
237 absent or insignificant for the other residues (Fig. S7B-F). These data support the hypothesis  
238 that phosphorylation of N-terminal PfGSK3 residues enhances PfGSK3 activity.

### 239 **N-terminal phosphorylation affects the PfGSK3 structure**

240 The phosphorylated residues at the PfGSK3 N-terminus are, based on structural homologs  
241 (24, 25), expected to be distant from the active site of the protein and it is therefore unclear  
242 how N-terminal phosphorylation regulates the protein activity. In the human counterpart, the  
243 phosphorylation of S9 prompts the binding of the N-terminus to a pocket for a priming  
244 phosphorylation in the substrate-binding region and reduces the binding affinity for substrates  
245 (24, 25). Hence, we investigated structural consequences of N-terminal phosphorylation in  
246 PfGSK3. Circular dichroism data on the least (F1) and most (F4) phosphorylated fractions  
247 show no pronounced differences in their secondary structure content (Fig. 8A). Thus, to  
248 investigate the impact of the N-terminal phosphorylation on the tertiary structure of PfGSK3,  
249 we used the *de novo* structure prediction server Robetta and the TrRefineRosetta method (70)

250 to generate initial PfGSK3 models that were further fitted against the SAXS data measured on  
251 separated PfGSK3 IEX fractions F1 and F4 (Table 1, see Fig. 1D). Using the wild type PfGSK3  
252 sequence as well as PfGSK3 sequences with phosphomimetic mutations (see Methods), we  
253 generated 25 models (Fig. 8A) that display similar structure of the core domains but are  
254 structurally diverse in both termini (Fig. 8A). We identified a subset of models that provide the  
255 best fits to the experimental SAXS data (Table 1, Fig. S8B) of fractions F1 or F4 (Fig. 8D).  
256 Overall, the models with a larger radius of gyration (see the point sizes in Fig. 8D) display  
257 lower  $\chi^2$  (goodness-of-fit) values. Further refinement of these best-fitting extended models was  
258 conducted in the program CORAL (71) that enables assigning additional flexibility to existing  
259 models (Fig. 8E,H). This approach led to poorer fits when only C-terminus (residues 403-440)  
260 or both N-terminus and C-terminus (residues 1-64 and 403-440) were assigned flexibility  
261 (Fig. 8E,H). However, conducting refinement with a disordered C-terminus (residues 403-440)  
262 and a flexible stretch of residues between the N-terminus and the PfGSK3 core (residues  
263 47-63, conformation B, Fig. 8E,H) led to two refined models displaying lower  $\chi^2$  values  
264 compared to the SAXS data from fraction F4. Ultimately, for both fractions, the models with  
265 the lowest  $\chi^2$  values display  $\alpha$ -helical structure at the N-terminus. This  $\alpha$ -helix is extended in  
266 the less phosphorylated F1 fraction (Fig. 8B) and folds back in the more phosphorylated F4  
267 fraction (Fig. 8C). The raw SAXS data support such conformational differences, as both the  
268 calculated radius of gyration  $R_g$  and maximum intra-particle distance  $D_{max}$  decrease from F1  
269 to F4 fraction ( $R_g$  3.4 vs 3.2 nm;  $D_{max}$  13 vs 12 nm, respectively, see Table 1). The  
270 dimensionless Kratky plot data representation also suggests a more extended conformation  
271 for the F1 fraction (Fig. S8C), as the F1 curve broadens and shifts to higher  $sR_g$  values relative  
272 to F4. The refined models fit the SAXS data well ( $\chi^2$  values of 1.19 and 1.06, respectively, Fig.  
273 8F,G), but should be viewed cautiously as an average representation of the conformations  
274 present in solution that contains a mixture of differently phosphorylated species. In conclusion,  
275 the combinatorial approach indeed shows that upon phosphorylation, PfGSK3 becomes more  
276 flexible, enabling a conformational change in the N-terminus. This change presumably  
277 mediates the increased PfGSK3 activity upon phosphorylation.

## 278 Discussion

279 Identification and characterization of novel drug targets in malaria remain an important goal  
280 as drug-resistant parasites are a persisting threat in the fight against malaria. PfGSK3 has  
281 been identified as a potential drug target since its inhibitors also possess potent and selective  
282 anti-plasmodial activity. Understanding its function is therefore important for further  
283 improvement of these inhibitors.

284 Here, we have shown that PfGSK3 is expressed in *E. coli* as a folded and functional protein  
285 with a heterogeneous phosphorylation pattern. We assume that the heterogeneity originating  
286 from this diverse phosphorylation is the main reason why we were not able to grow PfGSK3  
287 crystals for detailed structural characterization (72). Moreover, the PfGSK3 C-terminus,  
288 predicted to be disordered, and its unusual N-terminus represent additional challenges in  
289 protein crystallization. As the expression of inactive PfGSK3 protein (K96A, S226A, Y229A)  
290 as well as the removal of heavily phosphorylated N-terminus result in insoluble protein that  
291 lacks phosphorylation, other protein constructs and strategies will likely need to be considered  
292 for the structure determination of PfGSK3 in the future. At the same time, these results  
293 highlight the importance of both PfGSK3 phosphorylation and the necessity of an intact  
294 N-terminus for protein stability.

295 Our mass spectrometry analysis of the phosphorylation pattern on recombinant PfGSK3  
296 confirmed a number of PfGSK3 phosphorylation sites known from previous  
297 phosphoproteomics studies (S31, S62, S226, S228, Y229, S232) (37–39, 62–65). The  
298 additional phosphorylation sites at the N-terminus (Y39, S40, S42 and S43) might have  
299 occurred due to the heterologous expression, but could also hint towards additional  
300 phosphorylation sites present *in vivo* under certain conditions. In general, these  
301 phosphorylation sites are reminiscent of those identified in human GSK3 $\beta$ . In GSK3 $\beta$ , the  
302 autophosphorylation of Y216 in the activation loop is thought to maintain the constitutive  
303 activity of the protein (27, 29), while phosphorylation of N-terminal S9 by other kinases, such  
304 as PKA and PKB, inhibits the enzyme (6, 30). Although the role of the activation loop

305 autophosphorylation is likely conserved between the human and *P. falciparum* proteins, the  
306 role of N-terminal phosphorylation seems to be different.

307 First, the N-terminal sequence is not conserved between the two homologous proteins, with  
308 *Plasmodium* species displaying an unusual extension with a number of potential  
309 phosphorylation sites. Second, whereas N-terminal phosphorylation of S9 in human GSK3 is  
310 mediated by other kinases, the phosphorylation of N-terminal residues in PfGSK3 is the result  
311 of autophosphorylation, as we show here. Last, while phosphorylation of S9 in human GSK3  
312 inhibits its activity, our work illustrates that the increasing amount of phosphorylation on the  
313 PfGSK3 N-terminus results in an increased enzymatic activity.

314 Our structural investigation using the combination of structure prediction and its validation  
315 using experimental SAXS data provides further insights into how the N-terminal  
316 phosphorylation affects PfGSK3 structure. Two SAXS datasets originating from two differently  
317 phosphorylated IEX fractions of PfGSK3 directed the modelling towards PfGSK3  
318 conformations with an  $\alpha$ -helical N-terminus in both cases. However, this helix extends away  
319 from the active side of PfGSK3 in the less phosphorylated fraction, or folds back towards the  
320 center of the protein in the more phosphorylated fraction. It is possible that the “folded back”  
321 conformation (Fig. 8C) could be mediated by an N-terminal intramolecular coiled-coil  
322 interaction induced by phosphorylation, as the probability of coiled-coil formation increases  
323 with the increasing number of N-terminal PfGSK3 phosphomimetic mutations *in silico* (Fig.  
324 S8D). Interestingly, human GSK3 $\beta$  undergoes a similar conformational change, where upon  
325 phosphorylation of S9, its N-terminus binds in its substrate-binding region and competitively  
326 inhibits its activity (24, 25). However, N-terminal phosphorylation of PfGSK3 leads to an  
327 increase in enzymatic activity, suggesting a different regulatory mechanism. The  
328 conformational change upon phosphorylation might position the very N-terminus of PfGSK3  
329 close to its core domains, potentially enabling intramolecular interactions that could enhance  
330 its activity. Alternatively, the N-terminal extension might interact with the substrates to guide  
331 them to the PfGSK3 active site. In both cases, the conformational change would be driven by

332 phosphorylation of residues 39-43, whereas the interacting residues are possibly confined to  
333 the very N-terminus (residues 1-20) that is conserved in *Plasmodium* species (Fig. S6A,F).  
334 It should be noted that the N-termini of PfGSK3 homologues are not well conserved even  
335 among the representatives of *Apicomplexa*; however, a number of residues that can be  
336 phosphorylated could still enable a similar mode of regulation as we have described here (Fig.  
337 S7A,F). Indeed, S33 of *Plasmodium berghei* GSK3 (PBANKA\_0410400), equivalent to S40 in  
338 PfGSK3, was found to be phosphorylated in early gametogenesis (73). Residues equivalent  
339 to S40 of PfGSK3 are conserved across all *Plasmodium* species and residues that can be  
340 phosphorylated are also present in the vicinity of S40 in most *Plasmodium* species (equivalent  
341 to residues 38, 39 and 42 in *P. falciparum*), suggesting that the mechanism of regulation via  
342 N-terminal phosphorylation is preserved in all *Plasmodium* GSK3 proteins.

343 We have shown that this N-terminal phosphorylation, as well as the phosphorylation of the  
344 activation loop, are the result of PfGSK3 exhibiting autophosphorylation. This result confirms  
345 data in a recent publication, where the authors suspected that a high background in their  
346 phosphorylation assay could be attributed to autophosphorylation (74). Autophosphorylation  
347 of human GSK3 $\beta$  occurs directly after protein synthesis while the protein is associated with  
348 chaperones, such as HSP90 (27). Interestingly, a major contaminant during our PfGSK3  
349 purification process was *E. coli* DnaK that shares 48-57% identity with various *P. falciparum*  
350 Hsp70 proteins, indicating that chaperone-assisted autophosphorylation might be conserved  
351 across these taxa. Moreover, PfGSK3 was less soluble and had lower expression levels at  
352 lower temperatures (25°C and 18°C), at which the chaperone levels in *E. coli* are also reduced  
353 (75). This further supports that chaperons could be crucial interaction partner for the first  
354 stages of PfGSK3 autophosphorylation, which are likely crucial for its solubility.

355 Additionally, we have revealed another means of PfGSK3 regulation: the divalent heavy metal  
356 ions, such as zinc and copper, inhibit the activity of PfGSK3 by inducing the formation of  
357 heterogeneous high-MW particles. The ionic radii of these cations are in a small range of  
358 1.09-1.21 Å, indicating that the effect is mediated through a specific binding site. The fact that  
359 the protein becomes more sensitive to the metal ions only after the cleavage of the N-terminal

360 affinity tag indicates that this potential binding site could be located in close proximity to the  
361 N-terminus of PfGSK3. Indeed, a partially overlapping set of divalent cations inhibiting human  
362 GSK3 $\beta$  can be found in the literature, including lithium, beryllium, zinc, copper and mercury  
363 (17, 76, 77). Lithium and beryllium ions inhibit GSK3 by competing with magnesium ions that  
364 mediate ATP binding (77–79), but to our knowledge, they have not been shown to induce the  
365 formation of high-MW particles. To this date, there has been no structure of a GSK3 homolog  
366 with a bound heavy metal ion deposited in the PDB database, and thus the inhibition  
367 mechanism of heavy metal cations remains unknown. Importantly, as the high-MW particles  
368 can dissociate back into active PfGSK3 monomers, it cannot be excluded that this type of  
369 regulation is applied *in vivo*. The concentration of zinc in *Plasmodium* cytosol peaks at the late  
370 blood stages and should be sufficient to induce the formation of high-MW PfGSK3 species  
371 (80). Moreover, the concept of “auto-inhibitory polymerization” has already been described in  
372 detail for human CK2 (81), further underlining the possible similarities between PfCK2 and  
373 PfGSK3. It remains to be evaluated experimentally *in vivo* whether the PfGSK3 high-MW  
374 particles play a role in its native environment.

375 In conclusion, our work provides new insights into the function of PfGSK3 and its regulation  
376 by N-terminal phosphorylation and heavy metals, highlighting that phosphorylation influences  
377 the structure of the PfGSK3 N-terminus that in turn results in increased kinase activity.

## 378 **Experimental procedures**

### 379 **Cloning and mutagenesis**

380 The vector with N-terminally His-tagged PfGSK3 was generated by PCR amplification of the  
381 GSK3 coding sequence from *P. falciparum* cDNA followed by Ligation Independent Cloning  
382 into HindIII/KpnI-cleaved plasmid pOPIN F (82) using the In-Fusion HD EcoDry Cloning Kit  
383 (Takara Clontech) according to the manufacturer's instructions. The mutants S226A, Y229A  
384 and S226A/Y229A were generated by overlap extension PCR amplification from the original  
385 vector and Ligation Independent Cloning as described above. The wild-type protein and the  
386 mutant K96A cloned in pET28a vector were ordered from GenScript. The N-terminally  
387 truncated constructs were cloned by amplifying the sequence from the original vector and  
388 subcloning into BsaI-cleaved plasmid pNIC28\_Bsa4 by SLiCE cloning (83). The construct  
389 pSLI-GSK3-GFP-glms was generated by PCR-amplification of 1013 bp of the C-terminal  
390 GSK3 coding sequence from genomic DNA using primers GSK3\_NotI\_sense\_SLI and  
391 GSK3\_AvrII\_as\_fored\_int and cloning into pSLI-GFP-glms (84, 85) using NotI/AvrII restriction  
392 sites.

393

### 394 **PfGSK3 expression and purification**

395 *E. coli* C41(DE3) culture transformed with the PfGSK3 coding vector was grown in TB medium  
396 supplemented with 0.1 mg/ml ampicillin at 37°C, induced at OD<sub>600nm</sub>=0.7 with 0.5 mM IPTG  
397 and harvested after 4 hours. The pellets were resuspended in 5 mL of lysis buffer (20mM NaP  
398 pH 7.5, 300mM NaCl, 15mM imidazole, 5% glycerol, 0.5mM TCEP, 1 mg/ml lysozyme, 5 U/ml  
399 DNase, 1 Roche protease inhibitor tablet/100mL) per 1 g of wet weight culture. The  
400 suspension was passed three times through an emulsifier at 15 000 psi, centrifuged at  
401 19 000 x g and the supernatant was loaded on a pre-equilibrated His-Trap column. The  
402 column was washed with lysis buffer supplemented with 40 mM imidazole and the protein was  
403 eluted at increasing imidazole concentrations. The protein containing fractions were  
404 concentrated (10 kDa cut-off concentrator) with the addition of 1 mg of 3C protease per 3 L of



405 culture volume and further separated on a Superdex 200 HiLoad column (GE Healthcare) in  
406 50mM Tris pH 8.0, 20mM NaCl, 0.5mM TCEP. The protein containing fractions were  
407 concentrated again, loaded on ResourceQ anion exchange column (GE Healthcare) and  
408 eluted with increasing concentration of NaCl. Fractions representing different PfGSK3 species  
409 were pooled together, concentrated, dialyzed against the analysis buffer (typically 20mM Tris  
410 pH 8.0, 100mM NaCl, 0.5mM TCEP) and flash-frozen in liquid nitrogen and stored at -80°C.  
411 All purification steps were performed at 4°C.

### 412 **Expression and purification of insoluble PfGSK3 constructs**

413 The insoluble PfGSK3 constructs (K96A, S226A/Y229A, ΔN64) were expressed as described  
414 for the wild-type PfGSK3. The pellets of harvested bacteria were resuspended in 5 mL of lysis  
415 buffer (20mM NaP pH 7.5, 300mM NaCl, 15mM imidazole, 5% glycerol, 0.5mM TCEP, 1  
416 mg/ml lysozyme, 5 U/ml DNase, 1 Roche protease inhibitor tablet/100mL) per 1 g of wet  
417 weight culture. The suspension was passed three times through an emulsifier at 15 000 psi,  
418 centrifuged at 19 000 x g and the pellet was dissolved in a denaturing buffer (20mM NaP  
419 (pH 7.5), 300mM NaCl, 25mM imidazole, 5% glycerol, 6M urea, 0.5mM TCEP) and incubated  
420 with 1 mL NiNTA bead slurry (Sigma) for 1h, 4°C. The beads were subsequently washed twice  
421 with 10 ml of the same buffer and subsequently eluted with 5 ml of the same buffer containing  
422 extra 250 mM imidazole. The protein was concentrated (10 kDa c/o) and the sample for mass  
423 spectrometry was separated by SDS-PAGE gel.

### 424 **Small-scale expression tests**

425 4 mL of TB supplemented with ampicillin was inoculated with pre-cultured *E. coli* C41(DE3) that  
426 had been transformed with the tested plasmids. The cultures were grown at 37°C until the  
427  $OD_{600nm} = 0.6$  and further either induced with 0.5mM IPTG and grown for 4 hours at 37°C or  
428 25°C, or induced with 0.1mM IPTG and grown for 16 h at 18°C.  $OD_{600nm}$  was measured and  
429 culture volume corresponding to  $OD_{600nm}$  of 2.0/mL was harvested. The pellets were  
430 resuspended in 400  $\mu$ l of lysis buffer (lysate fractions), then lysed by 10 min of vortexing with

431 100  $\mu$ l glass beads and the cell debris were removed by centrifugation (soluble fractions). 5  $\mu$ l  
432 of each fraction was mixed with 10  $\mu$ l of loading dye and run on SDS-PAGE in duplicates. One  
433 gel of each set of samples was blotted on PVDF membrane (*BioRad*) The membranes were  
434 blocked by 1% BSA in TBS-T, washed, incubated for 1h with a HisProbe-HRP conjugated  
435 antibody (ThermoFisher), washed with TBS-T and the blot was developed using Super Signal  
436 West Pico Substrate (ThermoFisher) and Super Signal West Femto Substrate (ThermoFisher)  
437 in a 1:10 ratio.

#### 438 **Glutaraldehyde cross-linking**

439 1 mg/ml PfGSK3 in PBS and 0.5mM TCEP was mixed with 8x molar excess of either EDTA  
440 or ZnCl<sub>2</sub> and 0.01% glutaraldehyde. The reaction was quenched with 330mM Tris (final  
441 concentration) and SDS-PAGE loading dye and SDS-PAGE was run for 150 minutes at 150V.  
442 The gels were stained with Direct Blue stain.

#### 443 **Thermal shift assay**

444 The stability of PfGSK3 under different buffer conditions and additives was measured by  
445 nanoDSF (Prometheus NT.48, NanoTemper Technologies, GmbH). The protein  
446 concentration was adjusted to 1 mg/ml. 10  $\mu$ l of samples were loaded in the glass capillaries  
447 and heated from 20°C to 90°C with a heating rate of 1°C/min. The fluorescence signals with  
448 excitation wavelength of 280 nm and emission wavelengths of 330 and 350 nm were recorded  
449 and the melting temperature was calculated as maximum of the derivative of the fluorescence  
450 at 330 nm.

#### 451 **Circular dichroism**

452 Circular dichroism was measured on a Chirascan CD spectrometer (Applied Photophysics).  
453 The protein concentration was adjusted to 1  $\mu$ M by 2 mM NaP (pH 7.5), 4 mM NaCl,  
454 0.05 mM TCEP prior to the measurement. The circular dichroism spectrum was measured 10x  
455 between 185 nm and 260 nm with 1 nm step in 1 mm quartz cuvette and analyzed by the  
456 CDSSTR algorithm (86, 87) using DichroWeb (88).

#### 457 **Analytical size exclusion chromatography**

458 The analytical size exclusion chromatography was performed on an Agilent Bio-LC system  
459 using a home-packed Superose 5/150 column (25  $\mu$ l sample) or a Superose 6 Increase 10/300  
460 column (100  $\mu$ l sample). PBS supplemented with 0.5mM TCEP was used as a mobile phase  
461 and the resulting chromatograms were recorded using the as fluorescence signal with  
462 excitation wavelength of 280 nm and emission wavelength of 350 nm as readout.

#### 463 **Autophosphorylation IEX assay**

464 0.5 mg/ml of PfGSK3 was incubated at 37°C with 2mM ATP or cAMP and 10mM MgCl<sub>2</sub>  
465 overnight. The samples were subsequently dialyzed at 4°C overnight in 50mM Tris pH 8.0,  
466 20mM NaCl, 0.5mM TCEP. The samples were analyzed by analytical ion exchange  
467 chromatography using a Resource Q column (GE Healthcare) and the 1260 Infinity Bio-inert  
468 high-performance liquid chromatography system (Agilent Technologies) at 10 °C. The system  
469 and column were equilibrated in 50mM Tris pH 8.0, 20mM NaCl, 0.5mM TCEP. 100  $\mu$ l of  
470 sample was injected and eluted with an increasing concentration of NaCl. The system was  
471 run at 0.2 ml/min ad the elution profile was analyzed by UV fluorescence detector with  
472 absorbance at 280 nm and emission at 350 nm.

#### 473 **Small angle X-ray scattering**

474 The SAXS data were collected at the P12 BioSAXS Beamline at the PETRA III storage ring  
475 (c/o DESY, Hamburg, Germany) (89). The concentrated samples were dialyzed against  
476 (20 mM Tris pH 8.0, 100 mM NaCl, 0.5 mM TCEP overnight at 4°C and the concentration was  
477 adjusted to 10 mg/ml The X-ray scattering data were measured in an on-line SEC-SAXS  
478 mode, using a SD200 Increase 5/150 column (GE Healthcare) at 0.4 ml/min with 1 frame  
479 recorded per second (Table 1). The data were automatically processed using the SASFLOW  
480 pipeline (90) and further analyzed using the ATSAS suite (91) of programs to determine the  
481 molar mass, radius of gyration and real-space distance distribution. Scattering curves were  
482 computed from models using CRY SOL (92) with a constant subtraction and maximum order  
483 of harmonics set to 50. The rigid body modelling performed using CORAL (71), setting different

484 parts of models yielding best CRYSOLOG fits as disordered. These were residues 1-65 and  
485 403-440 in conformation A, residues 47-65 and 403-440 in conformation B and residues  
486 403-440 in conformation C. The raw data were uploaded to SASBDB under accession  
487 numbers SASDL77 and SASDL87.

#### 488 **Kinase assay**

489 To investigate enzymatic activity of recombinant PfGSK3 a commercial luminescence-based  
490 kinase assay (KinaseGlo Plus, Promega) was used as previously described (93). Briefly, 20 ng  
491 PfGSK3, 12  $\mu$ M GS-1 peptide substrate (residues 636-661 of the human glycogen synthase  
492 1; sequence YRRAAVPPSPSLSRHSSPHQ(pS)EDEEE; pS = prephosphorylated serine,  
493 Promega) and 6  $\mu$ M ATP (UltraPure, Promega) in the kinase reaction buffer (40 mM Tris-HCl  
494 pH 7.5; 20 mM MgCl<sub>2</sub>; 0.1 mg/mL BSA) were used as standard reaction mix (final reaction  
495 volume 5  $\mu$ l). The kinase reaction was performed for 30 min at 30°C followed by incubation  
496 with KinaseGlo reagent according to the manufacturer's instructions. The reaction was  
497 transferred to a solid white 384-well plate (NUNC, ThermoFisher) and the luminescence signal  
498 was measured in an EnVision Multilabel Plate Reader (PerkinElmer, Integration time 0.5  
499 sec/well). To investigate reaction kinetics, kinase and substrate concentrations were varied  
500 between 0 and 100 ng or 0 and 15  $\mu$ M respectively. To investigate autophosphorylation,  
501 reactions were performed with kinase concentrations between 0 and 500 ng, 30  $\mu$ M ATP and  
502 without a substrate.

#### 503 ***P. falciparum* culture**

504 Parasites were cultured in 5% O<sup>+</sup> human erythrocytes (Blood bank, Universitätsklinikum  
505 Hamburg Eppendorf) in RPMI medium supplemented with 0.5% Albumax at 37°C in an  
506 atmosphere of 1% O<sub>2</sub>, 5% CO<sub>2</sub> and 94% N<sub>2</sub> as described previously (94). Parasitemia was  
507 monitored by Giemsa-staining of methanol-fixed blood smears. The parasite strain 3D7 was  
508 used in this study (95).

#### 509 **Parasite imaging**

510 For live cell imaging parasite cultures were pelleted by centrifugation at 500x g for 1 min.  
511 Sedimented cells were resuspended in an equal volume of the supernatant, 5 µl of the sample  
512 were placed on a microscopy slide and covered with a cover slip. Fluorescence microscopy  
513 images were taken with a Leica DM6 B microscope equipped with Leica DFC9000 GT camera  
514 using an 100x immersion oil objective. Images were aquired with Leica Application Suite X  
515 (LAS X) software and processed using Adobe Photoshop CS2. Nuclei were stained with 1  
516 µg/ml DAPI (Biomol) in RPMI at 37°C for 15 min.

### 517 **Generation of transgenic parasite lines**

518 For Transfection, mature schizonts were enriched using 60% percoll and electroporated with  
519 50 µg of plasmid DNA using a Lonza Nucleofector II (96). Transfectants were seleected with  
520 4nM WR99210 (Jacobus Pharmaceuticals). Stable integrant cell lines were generated as  
521 previously described (84). Briefly, parasites carrying the WR99210-selected episomal plasmid  
522 were cultivated in the presence of 400 µg/ml G418 (Sigma) to select for integrants with the  
523 desired modification of the genomic locus. Correct genomic integration of the construct was  
524 confirmed by PCR using genomic DNA from G418-selected integrants and 3D7 wildtype.  
525 Genomic DNA was isolated using QIAamp DNA Mini Kit. For PCR analysis primers specific  
526 for 3' and 5' integration as well as wildtype locus of PfGSK3 were used.

### 527 **Purification of GSK3-GFP from *P. falciparum***

528 For purification of GSK3-GFP, parasites were synchronized by treatment with 5% sorbitol for  
529 10 min at 37°C and subsequently cultured in a volume of 50 ml with 5% hematocrit. Culture  
530 medium was changed daily until parasitemia had reached 8-10%. Erythrocytes were lysed  
531 with 0.03% saponin, isolated parasites were washed three times with ice cold PBS and  
532 resuspended in 2 ml lysis buffer (50 mM Tris-HCl pH 7.5, 150 mM NaCl, 0.5 mM TCEP, 1x  
533 protease inhibitor mix, 50 U/mL DNase). The sample was triturated five times through a 27G-  
534 needle (Braun) and further lysed by three cycles of freezing at -80°C followed by thawing on  
535 ice. The lysates were supplemented with 1% DDM and 0.1% CHS and incubated for 3 hours

536 at 4°C. Subsequently, the samples were mixed with 30 µl of GFP-Trap bead slurry  
537 (ChromoTek) and incubated on a rotatory wheel for 3 hours at 4°C. The beads were then  
538 washed with 1 ml of 150 mM NaCl, 10 mM Tris, protease inhibitor mix (Roche), 0.1% DDM,  
539 0.01% CHS pH 7.5 and with 1 ml of 300 mM NaCl, 10 mM Tris, protease inhibitor mix, 0.02%  
540 DDM, 0.002% CHS pH 7.5. The trapped proteins were eluted with 30 µl of 6% SDS, 250 mM  
541 Tris-HCl, pH 6.8, 71 mM TCEP at 95°C.

#### 542 **Sample preparation for mass spectrometry**

543 In-solution samples from parasite cell cultures were processed as previously described (97).  
544 To assess the phosphorylation status of the recombinant PfGSK3 (purified protein, separated  
545 IEX fractions, insoluble constructs), each sample was separated on SDS-PAGE gel.  
546 Coomassie-stained bands were excised, chopped into small pieces and transferred to 0.5 ml  
547 Eppendorf tubes. For all following steps, buffers were exchanged by two consecutive 15 min  
548 incubation steps of the gel pieces with 200 µl of acetonitrile (ACN), whereby the ACN was  
549 removed after each step. Proteins were reduced by the addition of 200 µl of a 10 mM DTT  
550 solution in 100 mM ammonium bicarbonate (AmBiC, Sigma Aldrich, A6141) and incubation at  
551 56°C for 30 min. Proteins were alkylated by the addition of 200 µl of 55 mM chloroacetamide  
552 (CAA)100 mM AmBiC solution and incubation for 20 min in the dark. A 0.1 µg/µl stock solution  
553 of trypsin (Promega, V511A) in trypsin resuspension buffer (Promega, V542A) was diluted  
554 with ice-cold 50 mM AmBiC buffer to achieve a final concentration of 1 ng/µl. 50 µl thereof  
555 were added to gel pieces, which were incubated first for 30 min on ice and then over night at  
556 37°C. Gel pieces were sonicated for 15 min, spun down and the supernatant was transferred  
557 into a glass vial (VDS Optilab, 93908556). Remaining gel pieces were washed with 50 µl of  
558 an aqueous solution of 50% ACN and 1% formic acid and sonicated for 15 min. The combined  
559 supernatants were dried in a speedvac and reconstituted in 10 µl of an aqueous solution of  
560 0.1% (v/v) formic acid.

#### 561 **Mass spectrometry data acquisition**

562 The mass spectra of the initial phosphorylation site assessment of PfGSK3 (Fig. SB) was  
563 performed as follows: An UltiMate 3000 RSLC nano LC system (Dionex) fitted with a trapping  
564 cartridge (Precolumn C18 PepMap100, 5 mm, 300  $\mu\text{m}$  i.d., 5  $\mu\text{m}$ , 100  $\text{\AA}$ ) and an analytical  
565 column (Acclaim PepMap 100. 75  $\times$  50 cm C18, 3 mm, 100  $\text{\AA}$ ) was used. Trapping was carried  
566 out with a constant flow of trapping solution (0.05% trifluoroacetic acid in water) at 30  $\mu\text{L}/\text{min}$   
567 onto the trapping column for 6 minutes. Subsequently, peptides were eluted via the analytical  
568 column running solvent A (0.1% formic acid in water) with a constant flow of 0.3  $\mu\text{L}/\text{min}$ , with  
569 increasing percentage of solvent B (0.1% formic acid in acetonitrile) from 2% to 4% in 4 min,  
570 from 4% to 8% in 2 min, then 8% to 28% for a further 37 min, in another 9 min. from 28%-  
571 40%, and finally 40%-80% for 3 min followed by re-equilibration back to 2% B in 5 min. The  
572 outlet of the analytical column was coupled directly to an Orbitrap QExactive™ plus Mass  
573 Spectrometer (Thermo) using the Nanospray Flex™ ion source in positive ion mode. The  
574 QExactive plus was operated in positive ion mode with a spray voltage of 2.2 kV and capillary  
575 temperature of 275°C. Full scan MS spectra with a mass range of 350–1400  $m/z$  were  
576 acquired in profile mode using a resolution of 70,000 (maximum injections time of 100 ms,  
577 AGC target was set to  $3 \times 10^6$  ions). Precursors were isolated using the quadrupole with a  
578 window of 1.7  $m/z$  and fragmentation was triggered by HCD in fixed collision energy mode  
579 with fixed collision energy of 28%. MS2 spectra were acquired with the Orbitrap with a  
580 resolution of 17,500 and a max injection time of 70 ms.

581 The mass spectra of all other experiments were recorded as follows: Peptides were analyzed  
582 by LC-MS/MS on an Orbitrap Fusion Lumos mass spectrometer (Thermo Scientific) as  
583 previously described (98). To this end, peptides were separated using an Ultimate 3000 nano  
584 RSLC system (Dionex) equipped with a trapping cartridge (Precolumn C18 PepMap100, 5  
585 mm, 300  $\mu\text{m}$  i.d., 5  $\mu\text{m}$ , 100  $\text{\AA}$ ) and an analytical column (Acclaim PepMap 100. 75  $\times$  50 cm  
586 C18, 3 mm, 100  $\text{\AA}$ ) connected to a nanospray-Flex ion source. For the detection of  
587 posttranslational modified peptides, peptides were loaded onto the trap column at 30  $\mu\text{l}$  per  
588 min using solvent A (0.1% formic acid) and peptides were eluted using a gradient from 2 to

589 80% Solvent B (0.1% formic acid in acetonitrile) over 60 min at 0.3  $\mu$ l per min (all solvents  
590 were of LC-MS grade). The Orbitrap Fusion Lumos was operated in positive ion mode with a  
591 spray voltage of 2.4 kV and capillary temperature of 275 °C. Full scan MS spectra with a mass  
592 range of 375–1200 m/z were acquired in profile mode using a resolution of 120,000 (maximum  
593 injections time of 50 ms, AGC target was set to Standard with a max injection time of 50 ms.  
594 Precursors were isolated using the quadrupole with a window of 1.2 m/z and fragmentation  
595 was triggered by HCD in fixed collision energy mode with fixed collision energy of 34%. MS2  
596 spectra were acquired with the Orbitrap with a resolution of 15,000 and a max injection time  
597 of 54 ms.

### 598 **Mass spectrometry data analysis**

599 Acquired data were analyzed using IsobarQuant (99) and Mascot V2.4 (Matrix Science) using  
600 a reverse UniProt FASTA database from *E. coli* (UP000000625) or *Plasmodium falciparum*  
601 (UP000001450) including common contaminants. The following modifications were taken into  
602 account: Carbamidomethyl (C, fixed), Acetyl (K, variable), Acetyl (Protein N-term, variable),  
603 Oxidation (M, variable), as well as the variable modification Phospho (ST) and Phospho (Y).  
604 The mass error tolerance for full scan MS spectra was set to 10 ppm and to 0.02 Da for MS/MS  
605 spectra. A maximum of 2 missed cleavages were allowed. A minimum of 2 unique peptides  
606 with a peptide length of at least seven amino acids and a false discovery rate below 0.01 were  
607 required on the peptide and protein level (100). Prior performing the search, the protein  
608 sequences corresponding to the expressed PfGSK3 constructs were added to the database  
609 for the expression host. The raw data have been uploaded to the PRIDE database with the  
610 dataset identifier PXD026387.

### 611 **Correlation analysis**

612 Each biological replicate of mass spectrometry experiment was paired with the corresponding  
613 biological replicate of the activity measurement. The relative phosphorylation of a residue was  
614 calculated as a ratio of number of time the residue was identified as phosphorylated (Mascot



615 score >32 and MD score  $\geq 5$ ) to number of times the residue was identified in the biological  
616 sample. The relative activity was calculated as buffer-subtracted readout of the luciferase  
617 assay relative to control. The strength of the linear association was calculated as Pearson  
618 correlation coefficient using R (101).

### 619 **Negative stain electron microscopy**

620 4  $\mu$ l of 0.01 mg/ml protein solution was applied to carbon-coated Cu/Pd grids and incubated  
621 for 1 min. Excess liquid was removed with the filter paper (Whatman), and the grid was washed  
622 twice with water for 5 s and 30 s. 4  $\mu$ l of 2% uranyl acetate were applied twice for 5 s and 30 s.  
623 The micrographs were collected on a Talos L120C (CSSB Cryo-EM multiuser facility) with  
624 70 000x magnification.

### 625 **Bioinformatics**

626 The homologous protein sequences were aligned with the program MAFFT (102) and depicted  
627 in Jalview. The secondary structure was predicted by Jpred (103). The PfGSK3 structures  
628 were predicted using the Robetta server and the TrRefineRosetta method (70). To simulate  
629 the different N-terminally phosphorylated species present in the protein fractions, we  
630 generated five models for each of the following PfGSK3 sequences: wild-type sequence, three  
631 sequences with a single phosphomimetic mutation (S40E, S42E, S43E) and one with a triple  
632 mutation S40E/S42E/S43E (abbreviated SE3). Per-residue local error estimates of the models  
633 calculated by Robetta (104) are written in the B-factor column of the PDB files. For  
634 phylogenetic analysis, protein sequences with highest identity scores were identified for  
635 individual organisms with the blastp suite of NCBI (105), the sequences were aligned with the  
636 ClustalW method and the R package msa (106), and the phylogenetic tree was calculated in  
637 PhyML with LG +G+I+F method (107). The phylogenetic tree with multiple sequence  
638 alignment was plotted using R package ggtree (108).

### 639 **Data availability**

640 The mass spectrometry data are available in PRIDE database with dataset identifier  
641 PXD026387. The SAXS data have been deposited in the SASBDB, accession numbers  
642 SASDL77 and SASDL87. All other raw data are available on Figshare (doi:  
643 10.6084/m9.figshare.14806887).

#### 644 **Supporting information**

645 This article contains supporting information.

#### 646 **Acknowledgments**

647 We thank the Sample Preparation and Characterization facility of EMBL Hamburg for support  
648 in nanoDSF, CD and DLS measurements. We also thank the Proteomics Core Facility of  
649 EMBL for the support in mass spectrometry sample preparation, measurements and analysis.  
650 We thank Maxime Killer and Vadim Kotov for the help with EM data acquisition and  
651 processing. Part of this work was performed at the CryoEM Facility at CSSB, supported by  
652 the UHH and DFG grant numbers (INST 152/772-1|152/774-1|152/775-1|152/776-1|152/777-  
653 1 FUGG). This work was supported by a grant from the Joachim Herz foundation (Nr. 800026)  
654 and the BMBF (grant number: 05K18YEA). AA is grateful for support by a Jürgen Manchot  
655 Stiftung fellowship.

#### 656 **Conflict of interests**

657 The authors declare that they have no conflicts of interest with the contents of this article.

## 658 References

- 659 1. World Health Organization (2019) *World Malaria Report*. <https://www.who.int/malaria>
- 660 2. Haldar, K., Bhattacharjee, S., and Safeukui, I. (2018) Drug resistance in Plasmodium.  
661 *Nat. Rev. Microbiol.* **16**, 156–170
- 662 3. Santos, R., Ursu, O., Gaulton, A., Bento, A. P., Donadi, R. S., Bologa, G., Karlsson, A.,  
663 Al-lazikani, B., Hersey, A., Oprea, T. I., and Overington, J. P. (2017) A comprehensive  
664 map of molecular drug targets. *Nat. Rev. Drug Discov.* **16**, 19–34
- 665 4. Cabrera, D. G., Horatscheck, A., Wilson, C. R., Basarab, G., Eyermann, C. J., and  
666 Chibale, K. (2018) Plasmodial Kinase Inhibitors: License to Cure? *J. Med. Chem.* **61**,  
667 8061–8077
- 668 5. PARKER, P. J., CAUDWELL, F. B., and COHEN, P. (1983) Glycogen Synthase from  
669 Rabbit Skeletal Muscle; Effect of Insulin on the State of phosphorylation of the Seven  
670 Phosphoserine Residues in vivo. *Eur. J. Biochem.* 10.1111/j.1432-  
671 1033.1983.tb07140.x
- 672 6. Cross, D. A. E., Alessi, D. R., Cohen, P., Andjelkovich, M., and Hemmings, B. A. (1995)  
673 Inhibition of glycogen synthase kinase-3 by insulin mediated by protein kinase B.  
674 *Nature.* 10.1038/378785a0
- 675 7. Welsh, G. I., and Proud, C. G. (1993) Glycogen synthase kinase-3 is rapidly inactivated  
676 in response to insulin and phosphorylates eukaryotic initiation factor eIF-2B. *Biochem.*  
677 *J.* 10.1042/bj2940625
- 678 8. Diehl, J. A., Cheng, M., Roussel, M. F., and Sherr, C. J. (1998) Glycogen synthase  
679 kinase-3 $\beta$  regulates cyclin D1 proteolysis and subcellular localization. *Genes Dev.*  
680 10.1101/gad.12.22.3499
- 681 9. Yamamoto, H., Kishida, S., Kishida, M., Ikeda, S., Takada, S., and Kikuchi, A. (1999)  
682 Phosphorylation of axin, a Wnt signal negative regulator, by glycogen synthase kinase-  
683 3 $\beta$  regulates its stability. *J. Biol. Chem.* 10.1074/jbc.274.16.10681
- 684 10. Turenne, G. A., and Price, B. D. (2001) Glycogen synthase kinase3 beta  
685 phosphorylates serine 33 of p53 and activates p53's transcriptional activity. *BMC Cell*  
686 *Biol.* 10.1186/1471-2121-2-12
- 687 11. Ikeda, S., Kishida, S., Yamamoto, H., Murai, H., Koyama, S., and Kikuchi, A. (1998)  
688 Axin, a negative regulator of the Wnt signaling pathway, forms a complex with GSK-3 $\beta$   
689 and  $\beta$ -catenin and promotes GSK-3 $\beta$ -dependent phosphorylation of  $\beta$ -catenin. *EMBO*  
690 *J.* 10.1093/emboj/17.5.1371
- 691 12. Hanger, D. P., Hughes, K., Woodgett, J. R., Brion, J. P., and Anderton, B. H. (1992)  
692 Glycogen synthase kinase-3 induces Alzheimer's disease-like phosphorylation of tau:  
693 Generation of paired helical filament epitopes and neuronal localisation of the kinase.  
694 *Neurosci. Lett.* 10.1016/0304-3940(92)90774-2
- 695 13. Yang, S. - D, Song, J. - S, Yu, J. - S, and Shiah, S. - G (1993) Protein Kinase  
696 FA/GSK- 3 Phosphorylates on Ser235- Pro and Ser404- Pro that Are Abnormally  
697 Phosphorylated in Alzheimer's Disease Brain. *J. Neurochem.* 10.1111/j.1471-  
698 4159.1993.tb09811.x
- 699 14. Aplin, A. E., Gibb, G. M., Jacobsen, J. S., Gallo, J. M., and Anderton, B. H. (1996) In  
700 vitro phosphorylation of the cytoplasmic domain of the amyloid precursor protein by  
701 glycogen synthase kinase-3 $\beta$ . *J. Neurochem.* 10.1046/j.1471-4159.1996.67020699.x
- 702 15. Ryder, J., Su, Y., Liu, F., Li, B., Zhou, Y., and Ni, B. (2003) Divergent roles of GSK3  
703 and CDK5 in APP processing. *Biochem. Biophys. Res. Commun.*  
704 10.1016/j.bbrc.2003.11.014
- 705 16. Ferrao Santos, S., Tasiaux, B., Sindic, C., and Octave, J. N. (2011) Inhibition of  
706 neuronal calcium oscillations by cell surface APP phosphorylated on T668. *Neurobiol.*  
707 *Aging.* 10.1016/j.neurobiolaging.2010.01.006
- 708 17. Eldar-Finkelman, H., and Martinez, A. (2011) GSK-3 Inhibitors: Preclinical and Clinical

- 709 Focus on CNS. *Front. Mol. Neurosci.* **4**, 1–18
- 710 18. Bourel, E., Grieco, S. F., and Jope, R. S. (2016) Glycogen synthase kinase-3 (GSK3):  
711 regulation, actions, and diseases. 10.1016/j.pharmthera.2014.11.016.Glycogen
- 712 19. Jope, R. S. (2011) Glycogen Synthase Kinase-3 in the Etiology and Treatment of Mood  
713 Disorders. *Front. Mol. Neurosci.* 10.3389/fnmol.2011.00016
- 714 20. Singh, K. K. (2013) An emerging role for Wnt and GSK3 signaling pathways in  
715 schizophrenia. *Clin. Genet.* 10.1111/cge.12111
- 716 21. De Sarno, P., Axtell, R. C., Raman, C., Roth, K. A., Alessi, D. R., and Jope, R. S. (2008)  
717 Lithium Prevents and Ameliorates Experimental Autoimmune Encephalomyelitis. *J.*  
718 *Immunol.* 10.4049/jimmunol.181.1.338
- 719 22. Del Ser, T., Steinwachs, K. C., Gertz, H. J., Andrés, M. V., Gómez-Carrillo, B., Medina,  
720 M., Vericat, J. A., Redondo, P., Fleet, D., and León, T. (2013) Treatment of Alzheimer's  
721 disease with the GSK-3 inhibitor tideglusib: A pilot study. *J. Alzheimer's Dis.*  
722 10.3233/JAD-2012-120805
- 723 23. Lovestone, S., Boada, M., Dubois, B., Hüll, M., Rinne, J. O., Huppertz, H. J., Calero,  
724 M., Andrés, M. V., Gómez-Carrillo, B., León, T., and Del Ser, T. (2015) A phase II trial  
725 of tideglusib in alzheimer's disease. *J. Alzheimer's Dis.* 10.3233/JAD-141959
- 726 24. Ter Haar, E., Coll, J. T., Austen, D. A., Hsiao, H. M., Swenson, L., and Jain, J. (2001)  
727 Structure of GSK3 $\beta$  reveals a primed phosphorylation mechanism. *Nat. Struct. Biol.* **8**,  
728 593–596
- 729 25. Dajani, R., Fraser, E., Roe, S. M., Young, N., Good, V., Dale, T. C., and Pearl, L. H.  
730 (2001) Crystal structure of glycogen synthase kinase 3 $\beta$ : Structural basis for phosphate-  
731 primed substrate specificity and autoinhibition. *Cell.* **105**, 721–732
- 732 26. Hughes, K., Nikolakaki, E., Plyte, S. E., Totty, N. F., and Woodgett, J. R. (1993)  
733 Modulation of the glycogen synthase kinase-3 family by tyrosine phosphorylation.  
734 *EMBO J.* 10.1002/j.1460-2075.1993.tb05715.x
- 735 27. Lochhead, P. A., Kinstrie, R., Sibbet, G., Rawjee, T., Morrice, N., and Cleghon, V.  
736 (2006) A chaperone-dependent GSK3 $\beta$  transitional intermediate mediates activation-  
737 loop autophosphorylation. *Mol. Cell.* **24**, 627–633
- 738 28. Cole, A. R., Causeret, F., Yadirgi, G., Hastie, C. J., McLauchlan, H., McManus, E. J.,  
739 Hernández, F., Eickholt, B. J., Nikolic, M., and Sutherland, C. (2006) Distinct priming  
740 kinases contribute to differential regulation of collapsin response mediator proteins by  
741 glycogen synthase kinase-3 in vivo. *J. Biol. Chem.* 10.1074/jbc.M513344200
- 742 29. Cole, A. R., Knebel, A., Morrice, N. A., Robertson, L. A., Irving, A. J., Connolly, C. N.,  
743 and Sutherland, C. (2004) GSK-3 phosphorylation of the Alzheimer epitope within  
744 collapsin response mediator proteins regulates axon elongation in primary neurons. *J.*  
745 *Biol. Chem.* 10.1074/jbc.C400412200
- 746 30. Sutherland, C., Leighton, I. A., and Cohen, P. (1993) Inactivation of glycogen synthase  
747 kinase-3 $\beta$  by phosphorylation: New kinase connections in insulin and growth-factor  
748 signalling. *Biochem. J.* **2296**, 15–19
- 749 31. Wichers, J. S., Scholz, J. A. M., Strauss, J., Witt, S., Lill, A., Ehnold, L. I., Neupert, N.,  
750 Liffner, B., Lühken, R., Petter, M., Lorenzen, S., Wilson, D. W., Löw, C., Lavazec, C.,  
751 Bruchhaus, I., Tannich, E., Gilberger, T. W., and Bachmann, A. (2019) Dissecting the  
752 gene expression, localization, membrane topology, and function of the plasmodium  
753 falciparum STEVOR protein family. *MBio.* 10.1128/mBio.01500-19
- 754 32. Prinz, B., Harvey, K. L., Wilcke, L., Ruch, U., Engelberg, K., Biller, L., Lucet, I., Erkelenz,  
755 S., Heincke, D., Spielmann, T., Doerig, C., Kunick, C., Crabb, B. S., Gilson, P. R., and  
756 Gilberger, T. W. (2016) Hierarchical phosphorylation of apical membrane antigen 1 is  
757 required for efficient red blood cell invasion by malaria parasites. *Sci. Rep.* **6**, 34479
- 758 33. Mordue, D. G., Desai, N., Dustin, M., and Sibley, L. D. (1999) Invasion by *Toxoplasma*  
759 *gondii* establishes a moving junction that selectively excludes host cell plasma  
760 membrane proteins on the basis of their membrane anchoring. *J. Exp. Med.*

- 761 10.1084/jem.190.12.1783
- 762 34. Narum, D. L., and Thomas, A. W. (1994) Differential localization of full-length and  
763 processed forms of PF83/AMA-1 an apical membrane antigen of Plasmodium  
764 falciparum merozoites. *Mol. Biochem. Parasitol.* 10.1016/0166-6851(94)90096-5
- 765 35. Triglia, T., Healer, J., Caruana, S. R., Hodder, A. N., Anders, R. F., Crabb, B. S., and  
766 Cowman, A. F. (2000) Apical membrane antigen 1 plays a central role in erythrocyte  
767 invasion by Plasmodium species. *Mol. Microbiol.* 10.1046/j.1365-2958.2000.02175.x
- 768 36. Treeck, M., Zacherl, S., Herrmann, S., Cabrera, A., Kono, M., Struck, N. S., Engelberg,  
769 K., Haase, S., Frischknecht, F., Miura, K., Spielmann, T., and Gilberger, T. W. (2009)  
770 Functional analysis of the leading malaria vaccine candidate AMA-1 reveals an  
771 essential role for the cytoplasmic domain in the invasion process. *PLoS Pathog.*  
772 10.1371/journal.ppat.1000322
- 773 37. Treeck, M., Sanders, J. L., Elias, J. E., and Boothroyd, J. C. (2011) The  
774 phosphoproteomes of plasmodium falciparum and toxoplasma gondii reveal unusual  
775 adaptations within and beyond the parasites' boundaries. *Cell Host Microbe.* **10**, 410–  
776 419
- 777 38. Solyakov, L., Halbert, J., Alam, M. M., Semblat, J.-P., Dorin-Semblat, D., Reininger, L.,  
778 Bottrill, A. R., Mistry, S., Abdi, A., Fennell, C., Holland, Z., Demarta, C., Bouza, Y.,  
779 Sicard, A., Nivez, M.-P., Eschenlauer, S., Lama, T., Thomas, D. C., Sharma, P.,  
780 Agarwal, S., Kern, S., Pradel, G., Graciotti, M., Tobin, A. B., and Doerig, C. (2011)  
781 Global kinomic and phospho-proteomic analyses of the human malaria parasite  
782 Plasmodium falciparum. *Nat. Commun.* **2**, 565
- 783 39. Lasonder, E., Green, J. L., Camarda, G., Talabani, H., Holder, A. A., Langsley, G., and  
784 Alano, P. (2012) The plasmodium falciparum schizont phosphoproteome reveals  
785 extensive phosphatidylinositol and cAMP-protein kinase A signaling. *J. Proteome Res.*  
786 **11**, 5323–5337
- 787 40. Vulliez-Le Normand, B., Tonkin, M. L., Lamarque, M. H., Langer, S., Hoos, S., Roques,  
788 M., Saul, F. A., Faber, B. W., Bentley, G. A., Boulanger, M. J., and Lebrun, M. (2012)  
789 Structural and functional insights into the malaria parasite moving junction complex.  
790 *PLoS Pathog.* 10.1371/journal.ppat.1002755
- 791 41. Cao, J., Kaneko, O., Thongkukiatkul, A., Tachibana, M., Otsuki, H., Gao, Q., Tsuboi,  
792 T., and Torii, M. (2009) Rhoptry neck protein RON2 forms a complex with microneme  
793 protein AMA1 in Plasmodium falciparum merozoites. *Parasitol. Int.*  
794 10.1016/j.parint.2008.09.005
- 795 42. Besteiro, S., Michelin, A., Poncet, J., Dubremetz, J. F., and Lebrun, M. (2009) Export  
796 of a Toxoplasma gondii rhoptry neck protein complex at the host cell membrane to form  
797 the moving junction during invasion. *PLoS Pathog.* 10.1371/journal.ppat.1000309
- 798 43. Alexander, D. L., Mital, J., Ward, G. E., Bradley, P., and Boothroyd, J. C. (2005)  
799 Identification of the moving junction complex of Toxoplasma gondii: A collaboration  
800 between distinct secretory organelles. *PLoS Pathog.* 10.1371/journal.ppat.0010017
- 801 44. Alexander, D. L., Arastu-Kapur, S., Dubremetz, J. F., and Boothroyd, J. C. (2006)  
802 Plasmodium falciparum AMA1 binds a rhoptry neck protein homologous to TgRON4, a  
803 component of the moving junction in Toxoplasma gondii. *Eukaryot. Cell.*  
804 10.1128/EC.00040-06
- 805 45. Leykauf, K., Treeck, M., Gilson, P. R., Nebl, T., Braulke, T., Cowman, A. F., Gilberger,  
806 T. W., and Crabb, B. S. (2010) Protein kinase a dependent phosphorylation of apical  
807 membrane antigen 1 plays an important role in erythrocyte invasion by the malaria  
808 parasite. *PLoS Pathog.* 10.1371/journal.ppat.1000941
- 809 46. Hodder, A. N., Crewther, P. E., Matthewll, M. L. S. M., Reid, G. E., Moritz, R. L.,  
810 Simpson, R. J., and Anders, R. F. (1996) The disulfide bond structure of Plasmodium  
811 apical membrane antigen-1. *J. Biol. Chem.* 10.1074/jbc.271.46.29446
- 812 47. Patel, A., Perrin, A. J., Flynn, H. R., Bisson, C., Withers-Martinez, C., Treeck, M.,

- 813 Flueck, C., Nicastro, G., Martin, S. R., Ramos, A., Gilberger, T. W., Snijders, A. P.,  
814 Blackman, M. J., and Baker, D. A. (2019) Cyclic AMP signalling controls key  
815 components of malaria parasite host cell invasion machinery. *PLoS Biol.*  
816 10.1371/journal.pbio.3000264
- 817 48. Wilde, M. L., Triglia, T., Marapana, D., Thompson, J. K., Kouzmitchev, A. A., Bullen, H.  
818 E., Gilson, P. R., Cowman, A. F., and Tonkina, C. J. (2019) Protein kinase A is essential  
819 for invasion of *Plasmodium falciparum* into human erythrocytes. *MBio.* **10**, 1–15
- 820 49. Fugel, W., Oberholzer, A. E., Gschloessl, B., Dzikowski, R., Pressburger, N., Preu, L.,  
821 Pearl, L. H., Baratte, B., Ratin, M., Okun, I., Doerig, C., Kruggel, S., Lemcke, T., Meijer,  
822 L., and Kunick, C. (2013) 3,6-Diamino-4-(2-halophenyl)-2-benzoylthieno[2,3-b]pyridine-  
823 5-carbonitriles are selective inhibitors of *Plasmodium falciparum* glycogen synthase  
824 kinase-3. *J Med Chem.* **56**, 264–275
- 825 50. Masch, A., Nasereddin, A., Alder, A., Bird, M. J., Schweda, S. I., Preu, L., Doerig, C.,  
826 Dzikowski, R., Gilberger, T. W., and Kunick, C. (2019) Structure-activity relationships  
827 in a series of antiplasmodial thieno[2,3-b]pyridines. *Malar. J.* **18**, 1–10
- 828 51. Moolman, C., van der Sluis, R., Beteck, R. M., and Legoabe, L. J. (2021) Exploration  
829 of benzofuran-based compounds as potent and selective *Plasmodium falciparum*  
830 glycogen synthase kinase-3 (PfGSK-3) inhibitors. *Bioorg. Chem.* **112**, 104839
- 831 52. OSOLODKIN, D. I., ZAKHAREVICH, N. V., PALYULIN, V. A., DANILENKO, V. N., and  
832 ZEFIROV, N. S. (2011) Bioinformatic analysis of glycogen synthase kinase 3: human  
833 versus parasite kinases. *Parasitology.* **138**, 725–735
- 834 53. Droucheau, E., Primot, A., Thomas, V., Mattei, D., Knockaert, M., Richardson, C.,  
835 Sallicandro, P., Alano, P., Jafarshad, A., Baratte, B., Kunick, C., Parzy, D., Pearl, L.,  
836 Doerig, C., and Meijer, L. (2004) *Plasmodium falciparum* glycogen synthase kinase-3:  
837 Molecular model, expression, intracellular localisation and selective inhibitors. *Biochim.*  
838 *Biophys. Acta - Proteins Proteomics.* **1697**, 181–196
- 839 54. Dajani, R., Fraser, E., Roe, S. M., Yeo, M., Good, V. M., Thompson, V., Dale, T. C.,  
840 and Pearl, L. H. (2003) Structural basis for recruitment of glycogen synthase kinase 3 $\beta$   
841 to the axin-APC scaffold complex. *EMBO J.* 10.1093/emboj/cdg068
- 842 55. Henley, Z. A., Bax, B. D., Inglesby, L. M., Champigny, A., Gaines, S., Faulder, P., Le,  
843 J., Thomas, D. A., Washio, Y., and Baldwin, I. R. (2017) From PIM1 to PI3K $\delta$  via  
844 GSK3 $\beta$ : Target Hopping through the Kinome. *ACS Med. Chem. Lett.*  
845 10.1021/acsmchemlett.7b00296
- 846 56. Gentile, G., Merlo, G., Pozzan, A., Bernasconi, G., Bax, B., Bamborough, P., Bridges,  
847 A., Carter, P., Neu, M., Yao, G., Brough, C., Cutler, G., Coffin, A., and Belyanskaya, S.  
848 (2012) 5-Aryl-4-carboxamide-1,3-oxazoles: Potent and selective GSK-3 inhibitors.  
849 *Bioorganic Med. Chem. Lett.* 10.1016/j.bmcl.2012.01.034
- 850 57. Gentile, G., Bernasconi, G., Pozzan, A., Merlo, G., Marzorati, P., Bamborough, P., Bax,  
851 B., Bridges, A., Brough, C., Carter, P., Cutler, G., Neu, M., and Takada, M. (2011)  
852 Identification of 2-(4-pyridyl)thienopyridinones as GSK-3 $\beta$  inhibitors. *Bioorganic Med.*  
853 *Chem. Lett.* 10.1016/j.bmcl.2011.06.050
- 854 58. Chu, N., Salguero, A. L., Liu, A. Z., Chen, Z., Dempsey, D. R., Ficarro, S. B., Alexander,  
855 W. M., Marto, J. A., Li, Y., Amzel, L. M., Gabelli, S. B., and Cole, P. A. (2018) Akt Kinase  
856 Activation Mechanisms Revealed Using Protein Semisynthesis. *Cell.*  
857 10.1016/j.cell.2018.07.003
- 858 59. Bax, B., Carter, P. S., Lewis, C., Guy, A. R., Bridges, A., Tanner, R., Pettman, G.,  
859 Mannix, C., Culbert, A. A., Brown, M. J. B., Smith, D. G., and Reith, A. D. (2001) The  
860 structure of phosphorylated GSK-3 $\beta$  complexed with a peptide, FRATtide, that inhibits  
861  $\beta$ -catenin phosphorylation. *Structure.* 10.1016/S0969-2126(01)00679-7
- 862 60. Liang, S. H., Chen, J. M., Normandin, M. D., Chang, J. S., Chang, G. C., Taylor, C. K.,  
863 Trapa, P., Plummer, M. S., Para, K. S., Conn, E. L., Lopresti-Morrow, L., Lanyon, L. F.,  
864 Cook, J. M., Richter, K. E. G., Nolan, C. E., Schachter, J. B., Janat, F., Che, Y.,  
865 Shanmugasundaram, V., Lefker, B. A., Enerson, B. E., Livni, E., Wang, L., Guehl, N.

- 866 J., Patnaik, D., Wagner, F. F., Perlis, R., Holson, E. B., Haggarty, S. J., El Fakhri, G.,  
867 Kurumbail, R. G., and Vasdev, N. (2016) Discovery of a Highly Selective Glycogen  
868 Synthase Kinase-3 Inhibitor (PF-04802367) That Modulates Tau Phosphorylation in the  
869 Brain: Translation for PET Neuroimaging. *Angew. Chemie - Int. Ed.*  
870 10.1002/anie.201603797
- 871 61. Wang, Y., Wach, J. Y., Sheehan, P., Zhong, C., Zhan, C., Harris, R., Almo, S. C.,  
872 Bishop, J., Haggarty, S. J., Ramek, A., Berry, K. N., O'Herin, C., Koehler, A. N., Hung,  
873 A. W., and Young, D. W. (2016) Diversity-Oriented Synthesis as a Strategy for  
874 Fragment Evolution against GSK3 $\beta$ . *ACS Med. Chem. Lett.*  
875 10.1021/acsmchemlett.6b00230
- 876 62. Pease, B. N., Huttlin, E. L., Jedrychowski, M. P., Talevich, E., Harmon, J., Dillman, T.,  
877 Kannan, N., Doerig, C., Chakrabarti, R., Gygi, S. P., and Chakrabarti, D. (2013) Global  
878 analysis of protein expression and phosphorylation of three stages of *Plasmodium*  
879 *falciparum* intraerythrocytic development. *J. Proteome Res.* **12**, 4028–4045
- 880 63. Ganter, M., Goldberg, J. M., Dvorin, J. D., Paulo, J. A., King, J. G., Tripathi, A. K., Paul,  
881 A. S., Yang, J., Coppens, I., Jiang, R. H. Y., Elsworth, B., Baker, D. A., Dinglasan, R.  
882 R., Gygi, S. P., and Duraisingh, M. T. (2017) Plasmodium falciparum CRK4 directs  
883 continuous rounds of DNA replication during schizogony. *Nat. Microbiol.* **2**, 17017
- 884 64. Kumar, S., Kumar, M., Ekka, R., Dvorin, J. D., Paul, A. S., Madugundu, A. K., Gilberger,  
885 T., Gowda, H., Duraisingh, M. T., Keshava Prasad, T. S., and Sharma, P. (2017)  
886 PfCDPK1 mediated signaling in erythrocytic stages of Plasmodium falciparum. *Nat.*  
887 *Commun.* **8**, 1–12
- 888 65. Flueck, C., Drought, L. G., Jones, A., Patel, A., Perrin, A. J., Walker, E. M., Nofal, S.  
889 D., Snijders, A. P., Blackman, M. J., and Baker, D. A. (2019) Phosphodiesterase beta  
890 is the master regulator of camp signalling during malaria parasite invasion. *PLoS Biol.*  
891 **17**, e3000154
- 892 66. Macek, B., Gnad, F., Soufi, B., Kumar, C., Olsen, J. V., Mijakovic, I., and Mann, M.  
893 (2008) Phosphoproteome analysis of E. coli reveals evolutionary conservation of  
894 bacterial Ser/Thr/Tyr phosphorylation. *Mol. Cell. Proteomics.* **7**, 299–307
- 895 67. Deutscher, J., and Saier, M. H. (2006) Ser/Thr/Tyr protein phosphorylation in bacteria  
896 - For long time neglected, now well established. *J. Mol. Microbiol. Biotechnol.* **9**, 125–  
897 131
- 898 68. Mann, N. H. (1984) Protein Phosphorylation in Escherichia coli and Purification of a  
899 Protein Kinase. *J. Biol. Chem.* **259**, 526–533
- 900 69. Savitski, M. M., Lemeer, S., Boesche, M., Lang, M., Mathieson, T., Bantscheff, M., and  
901 Kuster, B. (2011) Confident phosphorylation site localization using the mascot delta  
902 score. *Mol. Cell. Proteomics.* 10.1074/mcp.M110.003830
- 903 70. Yang, J., Anishchenko, I., Park, H., Peng, Z., Ovchinnikov, S., and Baker, D. (2020)  
904 Improved protein structure prediction using predicted interresidue orientations. *Proc.*  
905 *Natl. Acad. Sci. U. S. A.* 10.1073/pnas.1914677117
- 906 71. Petoukhov, M. V., Franke, D., Shkumatov, A. V., Tria, G., Kikhney, A. G., Gajda, M.,  
907 Gorba, C., Mertens, H. D. T., Konarev, P. V., and Svergun, D. I. (2012) New  
908 developments in the ATSAS program package for small-angle scattering data analysis.  
909 *J. Appl. Crystallogr.* 10.1107/S0021889812007662
- 910 72. Shrestha, A., Hamilton, G., O'Neill, E., Knapp, S., and Elkins, J. M. (2012) Analysis of  
911 conditions affecting auto-phosphorylation of human kinases during expression in  
912 bacteria. *Protein Expr. Purif.* **81**, 136–143
- 913 73. Invergo, B. M., Brochet, M., Yu, L., Choudhary, J., Beltrao, P., and Billker, O. (2017)  
914 Sub-minute Phosphoregulation of Cell Cycle Systems during Plasmodium Gamete  
915 Formation. *Cell Rep.* **21**, 2017–2029
- 916 74. Bui, H. T. N., Niederwieser, I., Bird, M. J., Dai, W., Brancucci, N. M. B., Moes, S., Jenoe,  
917 P., Lucet, I. S., Doerig, C., and Voss, T. S. (2019) Mapping and functional analysis of

- 918 heterochromatin protein 1 phosphorylation in the malaria parasite *Plasmodium*  
919 *falciparum*. *Sci. Rep.* 10.1038/s41598-019-53325-9
- 920 75. Arsène, F., Tomoyasu, T., and Bukau, B. (2000) The heat shock response of  
921 *Escherichia coli*. in *International Journal of Food Microbiology*, 10.1016/S0168-  
922 1605(00)00206-3
- 923 76. Ilouz, R., Kaidanovich, O., Gurwitz, D., and Eldar-Finkelman, H. (2002) Inhibition of  
924 glycogen synthase kinase-3 $\beta$  by bivalent zinc ions: Insight into the insulin-mimetic  
925 action of zinc. *Biochem. Biophys. Res. Commun.* 10.1016/S0006-291X(02)00636-8
- 926 77. Ryves, W. J., Harwood, A. J., Dajani, R., and Pearl, L. (2002) Glycogen synthase  
927 kinase-3 inhibition by lithium and beryllium suggests the presence of two magnesium  
928 binding sites. *Biochem. Biophys. Res. Commun.* 10.1006/bbrc.2001.6305
- 929 78. Ryves, W. J., and Harwood, A. J. (2001) Lithium inhibits glycogen synthase kinase-3  
930 by competition for magnesium. *Biochem. Biophys. Res. Commun.*  
931 10.1006/bbrc.2000.4169
- 932 79. Mudireddy, S. R., Abdul, A. R. M., Gorjala, P., and Gary, R. K. (2014) Beryllium is an  
933 inhibitor of cellular GSK-3 $\beta$  that is 1,000-fold more potent than lithium. *BioMetals*.  
934 10.1007/s10534-014-9783-y
- 935 80. Marvin, R. G., Wolford, J. L., Kidd, M. J., Murphy, S., Ward, J., Que, E. L., Mayer, M.  
936 L., Pennen-Hahn, J. E., Haldar, K., and O'Halloran, T. V. (2012) Fluxes in 'Free' and  
937 Total Zinc are Essential for Progression of Intraerythrocytic Stages of *Plasmodium*  
938 *falciparum*. *Bone*. **19**, 731–741
- 939 81. Lolli, G., Pinna, L. A., and Battistutta, R. (2012) Structural determinants of protein kinase  
940 CK2 regulation by autoinhibitory polymerization. *ACS Chem. Biol.* **7**, 1158–1163
- 941 82. Berrow, N. S., Alderton, D., Sainsbury, S., Nettleship, J., Assenberg, R., Rahman, N.,  
942 Stuart, D. I., and Owens, R. J. (2007) A versatile ligation-independent cloning method  
943 suitable for high-throughput expression screening applications. *Nucleic Acids Res.*  
944 10.1093/nar/gkm047
- 945 83. Zhang, Y., Werling, U., and Edelmann, W. (2014) Seamless Ligation Cloning Extract  
946 (SLiCE) cloning method. *Methods Mol. Biol.* **1116**, 235–244
- 947 84. Birnbaum, J., Flemming, S., Reichard, N., Soares, A. B., Mesén-Ramírez, P., Jonscher,  
948 E., Bergmann, B., and Spielmann, T. (2017) A genetic system to study *Plasmodium*  
949 *falciparum* protein function. *Nat. Methods*. 10.1038/nmeth.4223
- 950 85. Burda, P. C., Crosskey, T., Lauk, K., Zurborg, A., Söhnchen, C., Liffner, B., Wilcke, L.,  
951 Pietsch, E., Strauss, J., Jeffries, C. M., Svergun, D. I., Wilson, D. W., Wilmanns, M.,  
952 and Gilberger, T. W. (2020) Structure-Based Identification and Functional  
953 Characterization of a Lipocalin in the Malaria Parasite *Plasmodium falciparum*. *Cell*  
954 *Rep.* 10.1016/j.celrep.2020.107817
- 955 86. Manavalan, P., and Johnson, W. C. (1987) Variable selection method improves the  
956 prediction of protein secondary structure from circular dichroism spectra. *Anal.*  
957 *Biochem.* 10.1016/0003-2697(87)90135-7
- 958 87. Sreerama, N., and Woody, R. W. (2000) Estimation of protein secondary structure from  
959 circular dichroism spectra: Comparison of CONTIN, SELCON, and CDSSTR methods  
960 with an expanded reference set. *Anal. Biochem.* 10.1006/abio.2000.4880
- 961 88. Whitmore, L., and Wallace, B. A. (2008) Protein secondary structure analyses from  
962 circular dichroism spectroscopy: Methods and reference databases. *Biopolymers*.  
963 10.1002/bip.20853
- 964 89. Blanchet, C. E., Zozulya, A. V., Kikhney, A. G., Franke, D., Konarev, P. V., Shang, W.,  
965 Klaering, R., Robrahn, B., Hermes, C., Cipriani, F., Svergun, D. I., and Roessle, M.  
966 (2012) Instrumental setup for high-throughput small-and wide-angle solution scattering  
967 at the X33 beamline of EMBL Hamburg. *J. Appl. Crystallogr.*  
968 10.1107/S0021889812013490
- 969 90. Graewert, M. A., Franke, D., Jeffries, C. M., Blanchet, C. E., Ruskule, D., Kuhle, K.,



- 970 Flieger, A., Schäfer, B., Tartsch, B., Meijers, R., and Svergun, D. I. (2015) Automated  
971 pipeline for purification, biophysical and X-ray analysis of biomacromolecular solutions.  
972 *Sci. Rep.* 10.1038/srep10734
- 973 91. Franke, D., Petoukhov, M. V., Konarev, P. V., Panjkovich, A., Tuukkanen, A., Mertens,  
974 H. D. T., Kikhney, A. G., Hajizadeh, N. R., Franklin, J. M., Jeffries, C. M., and Svergun,  
975 D. I. (2017) ATSAS 2.8: A comprehensive data analysis suite for small-angle scattering  
976 from macromolecular solutions. *J. Appl. Crystallogr.* 10.1107/S1600576717007786
- 977 92. Svergun, D., Barberato, C., and Koch, M. H. (1995) CRY SOL - A program to evaluate  
978 X-ray solution scattering of biological macromolecules from atomic coordinates. *J. Appl.*  
979 *Crystallogr.* 10.1107/S0021889895007047
- 980 93. Schweda, S. I., Alder, A., and Gilberger, T. 4-Arylthieno[2,3-b]pyridine-2-carboxamides  
981 Are a New Class of Antiplasmodial Agents Sandra. *Molecules*
- 982 94. Trager, W., and Jensen, J. B. (1976) Human malaria parasites in continuous culture.  
983 *Science (80- )*. 10.1126/science.781840
- 984 95. Walliker, D., Quakyi, I. A., Wellems, T. E., McCutchan, T. F., Szarfman, A., London, W.  
985 T., Corcoran, L. M., Burkot, T. R., and Carter, R. (1987) Genetic analysis of the human  
986 malaria parasite *Plasmodium falciparum*. *Science (80- )*. 10.1126/science.3299700
- 987 96. Moon, R. W., Hall, J., Rangkuti, F., Ho, Y. S., Almond, N., Mitchell, G. H., Pain, A.,  
988 Holder, A. A., and Blackman, M. J. (2013) Adaptation of the genetically tractable malaria  
989 pathogen *Plasmodium knowlesi* to continuous culture in human erythrocytes. *Proc.*  
990 *Natl. Acad. Sci. U. S. A.* 10.1073/pnas.1216457110
- 991 97. Hughes, C. S., Foehr, S., Garfield, D. A., Furlong, E. E., Steinmetz, L. M., and  
992 Krijgsveld, J. (2014) Ultrasensitive proteome analysis using paramagnetic bead  
993 technology. *Mol. Syst. Biol.* 10.15252/msb.20145625
- 994 98. Sridharan, S., Kurzawa, N., Werner, T., Günthner, I., Helm, D., Huber, W., Bantscheff,  
995 M., and Savitski, M. M. (2019) Proteome-wide solubility and thermal stability profiling  
996 reveals distinct regulatory roles for ATP. *Nat. Commun.* 10.1038/s41467-019-09107-y
- 997 99. Franken, H., Mathieson, T., Childs, D., Sweetman, G. M. A., Werner, T., Tögel, I., Doce,  
998 C., Gade, S., Bantscheff, M., Drewes, G., Reinhard, F. B. M., Huber, W., and Savitski,  
999 M. M. (2015) Thermal proteome profiling for unbiased identification of direct and indirect  
1000 drug targets using multiplexed quantitative mass spectrometry. *Nat. Protoc.*  
1001 10.1038/nprot.2015.101
- 1002 100. Savitski, M. M., Wilhelm, M., Hahne, H., Kuster, B., and Bantscheff, M. (2015) A  
1003 scalable approach for protein false discovery rate estimation in large proteomic data  
1004 sets. *Mol. Cell. Proteomics.* 10.1074/mcp.M114.046995
- 1005 101. R Core Team (2020) (2020) R: A language and environment for statistical computing.  
1006 *R A Lang. Environ. Stat. Comput. R Found. Stat. Comput. Vienna, Austria*
- 1007 102. Rozewicki, J., Li, S., Amada, K. M., Standley, D. M., and Katoh, K. (2019) MAFFT-  
1008 DASH: integrated protein sequence and structural alignment. *Nucleic Acids Res.*  
1009 10.1093/nar/gkz342
- 1010 103. Cole, C., Barber, J. D., and Barton, G. J. (2008) The Jpred 3 secondary structure  
1011 prediction server. *Nucleic Acids Res.* 10.1093/nar/gkn238
- 1012 104. Hiranuma, N., Park, H., Baek, M., Anishchenko, I., Dauparas, J., and Baker, D. (2021)  
1013 Improved protein structure refinement guided by deep learning based accuracy  
1014 estimation. *Nat. Commun.* 10.1038/s41467-021-21511-x
- 1015 105. Camacho, C., Coulouris, G., Avagyan, V., Ma, N., Papadopoulos, J., Bealer, K., and  
1016 Madden, T. L. (2009) BLAST+: Architecture and applications. *BMC Bioinformatics.* **10**,  
1017 421
- 1018 106. Bodenhofer, U., Bonatesta, E., Horejš-Kainrath, C., and Hochreiter, S. (2015) Msa: An  
1019 R package for multiple sequence alignment. *Bioinformatics.* **31**, 3997–3999
- 1020 107. Guindon, S., Dufayard, J. F., Lefort, V., Anisimova, M., Hordijk, W., and Gascuel, O.  
1021 (2010) New algorithms and methods to estimate maximum-likelihood phylogenies:

- 1022 Assessing the performance of PhyML 3.0. *Syst. Biol.* 10.1093/sysbio/syq010
- 1023 108. Yu, G. (2020) Using ggtree to Visualize Data on Tree-Like Structures. *Curr. Protoc.*  
1024 *Bioinforma.* **35**, 3041–3043
- 1025 109. Drozdetskiy, A., Cole, C., Procter, J., and Barton, G. J. (2015) JPred4: A protein  
1026 secondary structure prediction server. *Nucleic Acids Res.* 10.1093/nar/gkv332
- 1027 110. Prommana, P., Uthaipibull, C., Wongsombat, C., Kamchonwongpaisan, S., Yuthavong,  
1028 Y., Knuepfer, E., Holder, A. A., and Shaw, P. J. (2013) Inducible Knockdown of  
1029 Plasmodium Gene Expression Using the glmS Ribozyme. *PLoS One.* **8**, e73783
- 1030 111. Daubenberger, C. A., Tisdale, E. J., Curcic, M., Diaz, D., Silvie, O., Mazier, D., Eling,  
1031 W., Bohrmann, B., Matile, H., and Pluschke, G. (2003) The N'-terminal domain of  
1032 glyceraldehyde-3-phosphate dehydrogenase of the apicomplexan Plasmodium  
1033 falciparum mediates GTPase Rab2-dependent recruitment to membranes. *Biol. Chem.*  
1034 **384**, 1227–1237
- 1035

1036 **Abbreviations**

|      |              |                                                        |
|------|--------------|--------------------------------------------------------|
| 1037 | AMA1         | <i>Plasmodium falciparum</i> Apical membrane Antigen 1 |
| 1038 | GSK3 $\beta$ | Glycogen Synthase Kinase beta                          |
| 1039 | IEX          | ion exchange chromatography                            |
| 1040 | IMAC         | immobilized metal affinity chromatography              |
| 1041 | high-MW      | high molecular weight                                  |
| 1042 | PfGSK3       | <i>Plasmodium falciparum</i> Glycogen Synthase Kinase  |
| 1043 | SEC          | size exclusion chromatography                          |

1044

1045 **Table 1.** SAXS sample details, data acquisition parameters, structural parameters and  
 1046 atomistic modelling.

| <b>Sample details</b>                                                            |                                          |                   |
|----------------------------------------------------------------------------------|------------------------------------------|-------------------|
| Sample                                                                           | PfGSK3 – F1                              | PfGSK3 – F4       |
| Organism                                                                         | <i>P. falciparum</i>                     |                   |
| Source                                                                           | <i>E. coli</i> (DE3) C41                 |                   |
| UniProt ID                                                                       | O77344                                   |                   |
| Extinction coefficient $\epsilon$ (at 280 nm, M <sup>-1</sup> cm <sup>-1</sup> ) | 48250                                    |                   |
| Molecular weight from chemical composition (Da)                                  | 52045.2                                  |                   |
| Concentration (analysis or injection, mg/ml)                                     | 10                                       |                   |
| Solvent composition                                                              | 20mM Tris pH 8.0, 100mM NaCl, 0.5mM TCEP |                   |
| <b>SAS data collection parameters</b>                                            |                                          |                   |
| Beamline                                                                         | P12, DESY/EMBL, Hamburg (Germany)        |                   |
| Detector                                                                         | Pilatus 6M                               |                   |
| Energy (keV)                                                                     | 10.0                                     |                   |
| Sample-to-detector distance (mm)                                                 | 3000                                     |                   |
| $q$ -measurement range ( $\text{\AA}^{-10}$ )                                    | 0.003-0.732                              |                   |
| Absolute scaling method                                                          | Relative to the scattering of pure water |                   |
| Method for monitoring radiation damage                                           | Frame comparison                         |                   |
| Exposed time for frame                                                           | 900 s (900 x 1 s)                        | 900 s (900 x 1 s) |
| Mode                                                                             | SEC-SAXS                                 | SEC-SAXS          |
| Sample temperature (°C)                                                          | 20                                       | 20                |
| <b>Structural parameters</b>                                                     |                                          |                   |

|                                                     |                                                                              |                                  |
|-----------------------------------------------------|------------------------------------------------------------------------------|----------------------------------|
| Guinier analysis                                    |                                                                              |                                  |
| I(0) (cm <sup>-1</sup> )                            | 0.037±0.001                                                                  | 0.021±0.001                      |
| R <sub>g</sub> (Å)                                  | 34.3±0.4                                                                     | 31.5±0.2                         |
| q-range (Å <sup>-1</sup> )                          | 0.01-0.04                                                                    | 0.01-0.04                        |
| Fidelity (Quality of fit parameter, <i>AutoRg</i> ) | 0.58                                                                         | 0.98                             |
| Molecular weight (kDa)*                             |                                                                              |                                  |
| From V <sub>c</sub>                                 | 66.2                                                                         | 48.7                             |
| From MoW                                            | 86.0                                                                         | 34.1                             |
| P(r) analysis                                       |                                                                              |                                  |
| I(0) (cm <sup>-1</sup> )                            | 0.037±0.001                                                                  | 0.021±0.001                      |
| R <sub>g</sub> (Å)                                  | 35.8±0.01                                                                    | 32.5±0.01                        |
| D <sub>max</sub> (Å)                                | 130±10                                                                       | 115±10                           |
| q-range (Å <sup>-1</sup> )                          | 0.01-0.50                                                                    | 0.01-0.25                        |
| Total quality estimate                              | 0.62                                                                         | 0.82                             |
| Porod volume x 10 <sup>3</sup> (Å <sup>3</sup> )    | 105                                                                          | 101                              |
| <b>Atomistic modelling**</b>                        | CRY SOL with constant subtraction and maximum order of harmonics equal to 50 | CORAL hybrid rigid body modeling |
| Structures                                          | Robetta model WLT (4)                                                        |                                  |
| q-range for modelling (Å <sup>-1</sup> )            | 0.01-0.50                                                                    | 0.01-0.58                        |
| χ <sup>2</sup>                                      | 1.19                                                                         | 1.06                             |
| Predicted R <sub>g</sub> (Å)                        | 35.3                                                                         |                                  |
| Starting crystal structures                         |                                                                              | Robetta model 3SE (4)            |
| Flexible residues                                   |                                                                              | 47-63, 403-440                   |
| <b>SASBDB IDs for data and models</b>               |                                                                              |                                  |
|                                                     | SASDL77                                                                      | SASDL87                          |

1047 \* calculated using the appropriate functions in ATSAS (91).

1048 \*\* The values for the best model for each respective dataset are shown.

1049 Figure 1

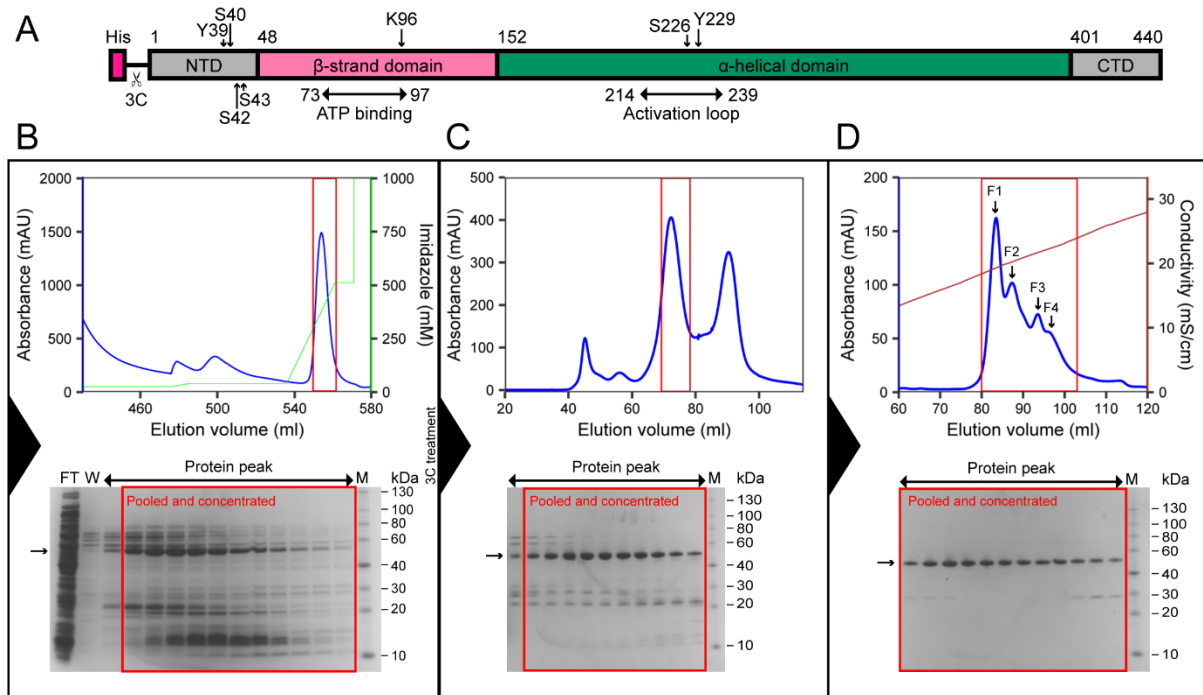

1050

1051 **Fig. 1. Expression and purification of PfGSK3.**

1052 (A) Construct of PfGSK3 used for expression. The construct consists of the full-length  
1053 sequence of PfGSK3 with an N-terminal His-tag and a 3C cleavage site. The domain  
1054 organization and phosphorylation sites are marked. NTD is the N-terminal domain, CTD is the  
1055 C-terminal domain, 3C is the 3C protease cleavage cite. (B) First PfGSK3 purification step:  
1056 imidazole gradient elution profile from the His-Trap column. (C) Elution profile from the  
1057 Superdex 200 size exclusion column. (D) NaCl gradient elution profile from Resource Q ion  
1058 exchange column. The peaks of the ion exchange elution represent fractions that are  
1059 phosphorylated to different extent, increasing from F1 to F4. The blue curves in the  
1060 chromatograms show UV absorbance, the green curve shows imidazole concentration and  
1061 the brown curve shows the conductivity. The peaks in red squares in chromatograms  
1062 correspond to the red squares in corresponding SDS-PAGE gels.

1063 Figure 2

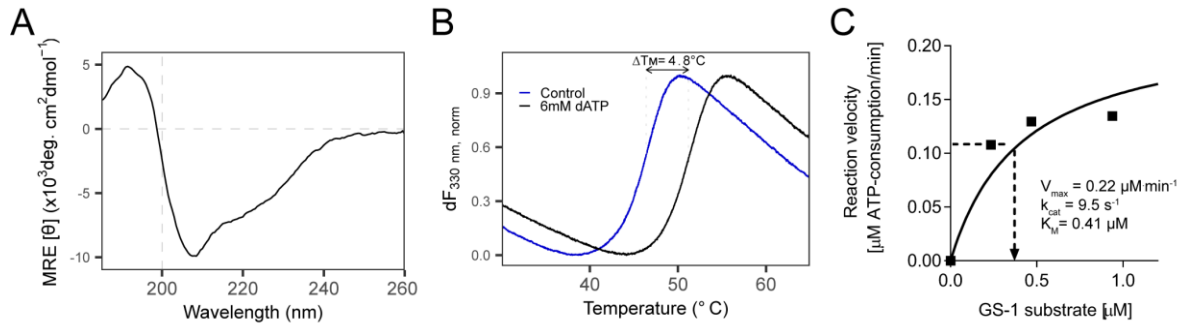

1064

1065 **Fig. 2. Characterization of PfGSK3.**

1066 (A) Circular dichroism shows secondary structure composition similar to what is expected for  
1067 a GSK3 protein, with 22%  $\alpha$  helix, 26%  $\beta$  sheet, 24% turns and 29% disordered content. The  
1068 circular dichroism was measured 10x and the data were averaged, buffer subtracted, and  
1069 analyzed by DichroWeb. (B) Thermal unfolding profiles of PfGSK3 in presence or absence of  
1070 6mM dATP. dATP stabilizes PfGSK3, suggesting that it binds in the ATP binding pocket. (C)  
1071 Catalytic activity of GSK3 follows Michaelis-Menten kinetics. Saturation curve shows the  
1072 reaction velocity (as calculated in FigS2F) plotted against different substrate concentrations.  
1073 Michaelis-Menten constant ( $K_m$ ), maximal reaction velocity ( $V_{\max}$ ) and turnover number ( $k_{\text{cat}}$ )  
1074 were calculated in GraphPad Prism using nonlinear regression. GS-1 = substrate peptide of  
1075 the human glycogen synthase.

1076 Figure 3

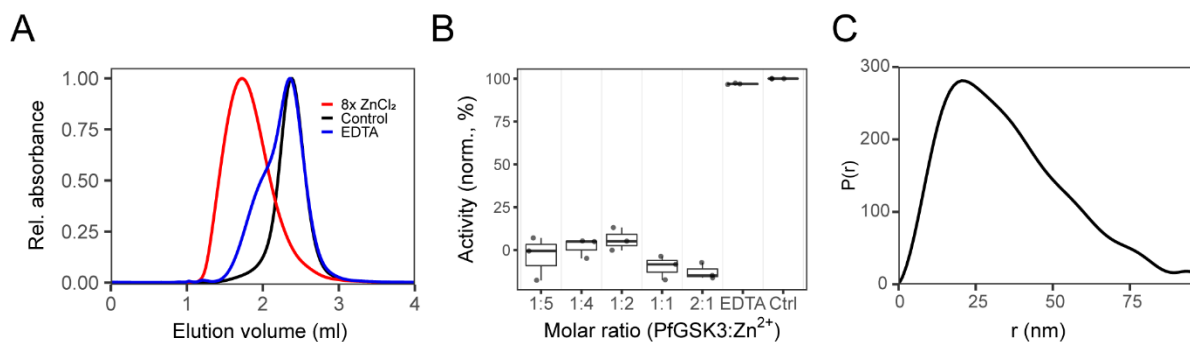

1077

1078 **Fig. 3. Heavy metal ions inhibit PfGSK3 activity.**

1079 (A) Analytical size exclusion chromatography profiles on a Superose 6 column of PfGSK3  
1080 apoprotein (black), after addition of 8x molar excess of zinc chloride (red) and after  
1081 subsequent addition of EDTA (blue). The analysis shows that zinc ions induce the formation  
1082 of high-MW PfGSK3 species. The formation is reversible because addition of EDTA shifts the  
1083 elution profiles towards higher elution volumes. (B) The activity of PfGSK3 is strongly reduced  
1084 in the presence of zinc ions, whereas the protein regains the activity after the addition of the  
1085 metal chelator EDTA. (C) The distance distribution of the PfGSK3 high-MW species induced  
1086 by zinc ions derived from SAXS data shows high heterogeneity in the sample, peaking at  
1087 20 nm but with  $D_{max}=89$  nm.

1088 Figure 4

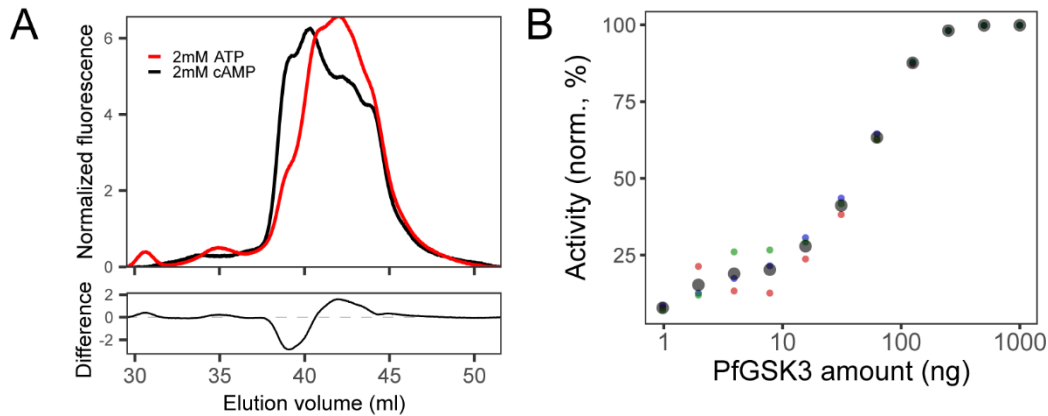

1089

1090 **Fig. 4. PfGSK3 exhibits autophosphorylation.**

1091 (A) IEX elution chromatograms (upper plot) of PfGSK3 after incubation with ATP (red) or cAMP  
1092 as negative control (black) in the presence of magnesium ions suggest that PfGSK3 exhibits  
1093 autophosphorylation. The difference between both chromatograms (bottom plot) shows an  
1094 increase of later-eluting species after ATP treatment, indicating higher amount of  
1095 phosphorylation. (B) The ATP consumption measured by the luminescence assay in the  
1096 absence of the substrate is dependent on the enzyme concentration, which is indicative of the  
1097 autophosphorylation exhibited by PfGSK3.



1098 **Figure 5**

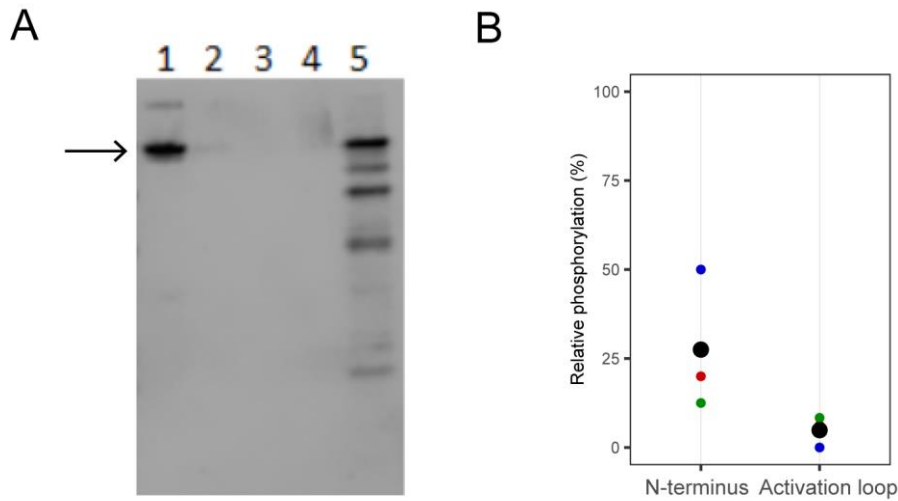

1099

1100 **Fig. 5. N-terminus of PfGSK3 is phosphorylated *in vivo*.**

1101 (A) Western blot with anti-GFP antibodies shows the purification of PfGSK3-GFP from the  
1102 plasmodium lysate (1), flow-through (2), two wash steps (3-4) and elution fraction (5). (B) The  
1103 mass spectrometry analysis revealed that the N-terminal residues contain higher relative  
1104 amount of phosphorylation (27%) compared to the activation loop (5%). The colored points  
1105 are ratios from individual mass spectrometry experiment replicates and the large black points  
1106 are their averages.

1107 Figure 6

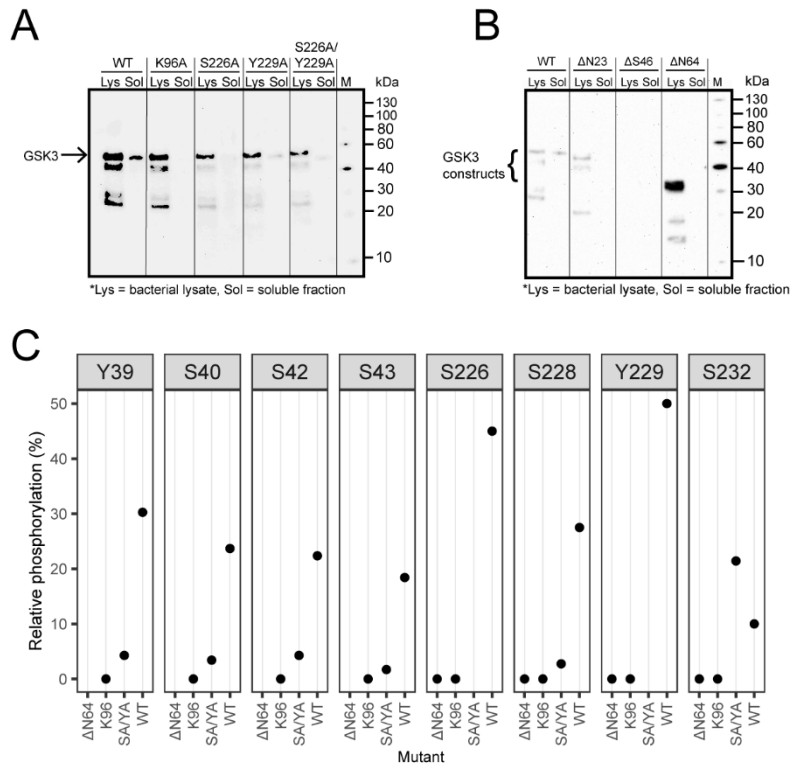

1108

1109 **Fig. 6. The N-terminus and phosphorylation is essential for PfGSK3**

1110 (A) Small-scale expression test of PfGSK3 mutants with inactivating mutations in the ATP  
 1111 binding site (K96A) and activation loop (Y226A and S229A). Whereas all protein constructs  
 1112 are expressed, only the wild type PfGSK3 is soluble, which indicates that the  
 1113 autophosphorylation of PfGSK3 is important for its solubility. (B) Small-scale expression test  
 1114 of PfGSK3 N-truncated constructs that start with residues N23, S46 or N64. In spite of a very  
 1115 strong expression of PfGSK3-N64, none of the proteins is soluble, indicating that the PfGSK3  
 1116 N-terminus is crucial for the autophosphorylation process. The bacterial lysates (Lys) and their  
 1117 soluble fractions (Sol) were analyzed by Western blot with anti-His antibodies. (C) Analysis of  
 1118 phosphorylation of PfGSK3 mutants shows that the phosphorylation is completely lost (K96A,  
 1119 ΔN64) or reduced (S226A/Y229A) compared to the wild-type protein (WT).

1120 Figure 7

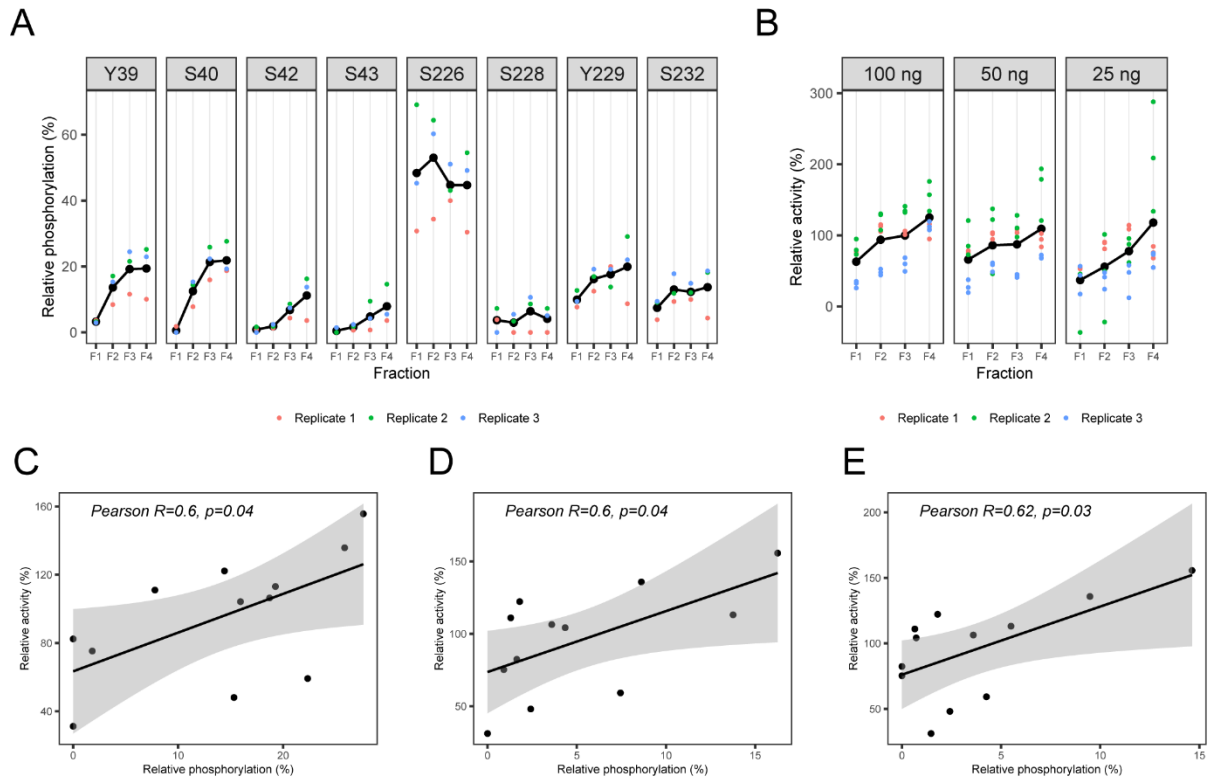

1121

1122 **Fig. 7. N-terminal phosphorylation promotes PfGSK3 activity.**

1123 (A) Relative phosphorylation of selected residues in the individual PfGSK3 fractions separated  
1124 by ion exchange chromatography. The relative phosphorylation represents the fraction of all  
1125 identified residues that were also identified as phosphorylated by LC-MS/MS with Mascot  
1126 score > 32 and MD score  $\geq 5$ . The data show that the residues in the N-terminal domain are  
1127 gradually more phosphorylated with increasing IEX elution volume, whereas the  
1128 phosphorylation at the activation loop remains constant. The different colors represent three  
1129 biological triplicates. (B) Activity of individual PfGSK3 fractions separated by ion exchange  
1130 chromatography measured with different PfGSK3 amount (100, 50 and 25 ng). The data show  
1131 a general trend towards higher activity with increasing phosphorylation in the N-terminal  
1132 domain. The activity was measured in biological triplicates and at different PfGSK3  
1133 concentrations. (C-E) Correlation between the relative phosphorylation of the residues S40,  
1134 S42 and S43 measured by mass spectrometry, respectively, and the relative activity of the

1135 same samples (triplicates of fractions F1-F4). The data were fitted with a linear model (black  
1136 line), the gray background shows the 95% confidence interval.

1137 Figure 8

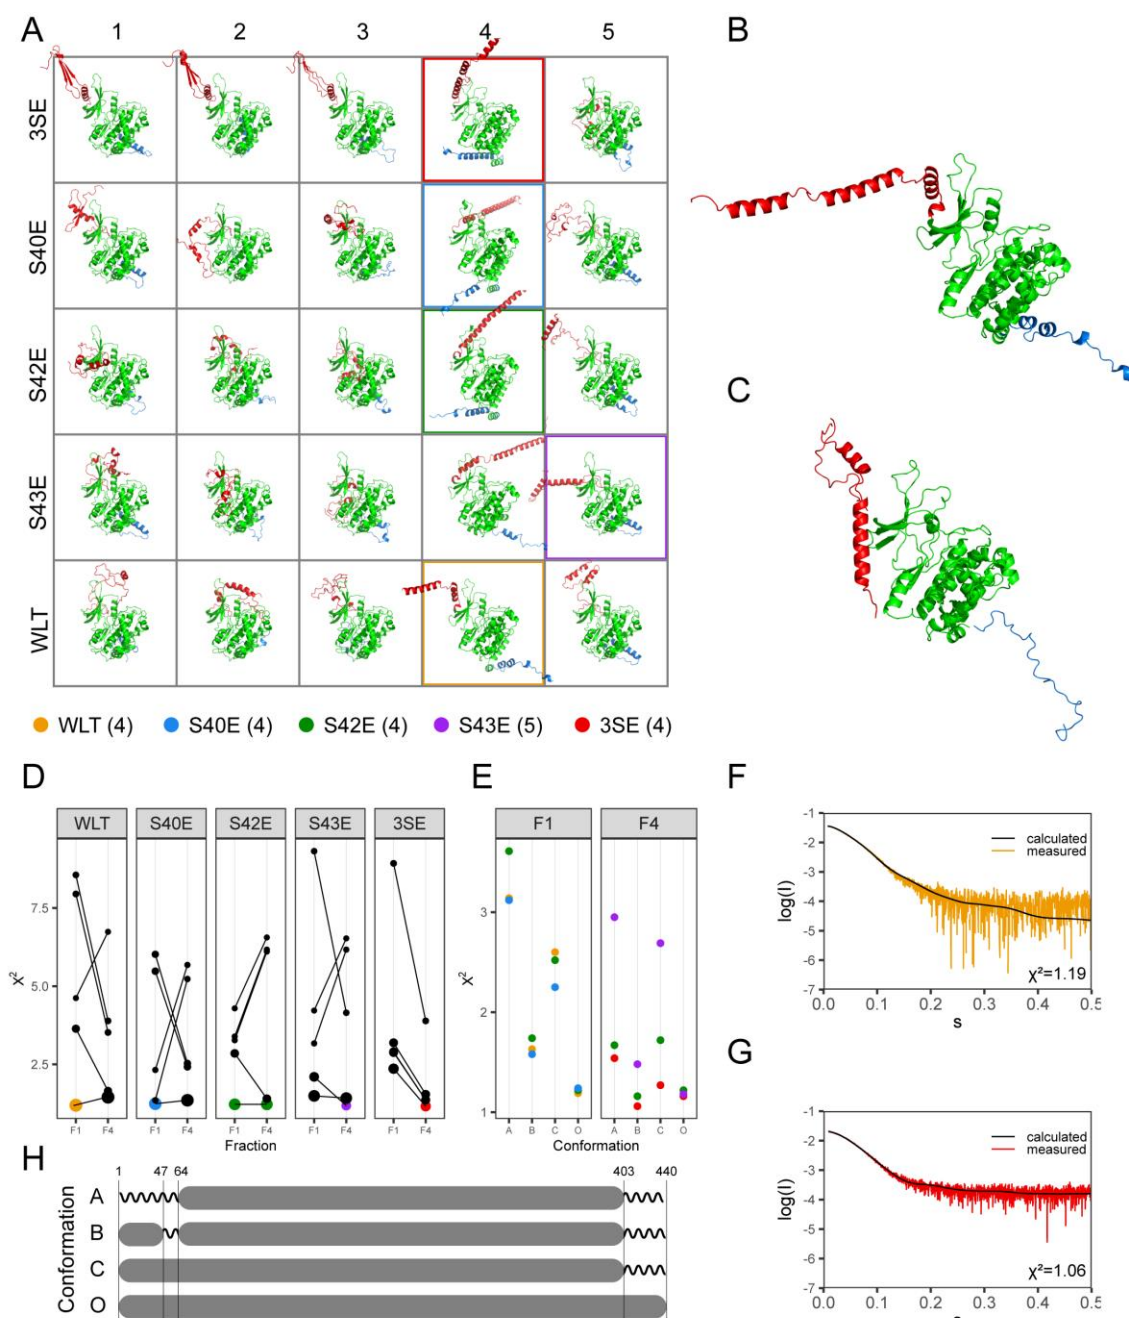

1138

1139 **Fig. 8. The N-terminus of PfGSK3 changes the structure upon phosphorylation**

1140 (A) Structural models of PfGSK3 predicted by the Robetta server. Five different sequences  
 1141 were used as an input for the prediction and five models were predicted for each sequence.  
 1142 N-termini (residues 1-65) are red, the core domains green and C-termini (residues 403-440)  
 1143 blue. (B) The Robetta model that fits the SAXS data from F1 fraction best display an extended  
 1144 N-terminal helix. (C) The Robetta model refined against SAXS data from fraction F4 using

1145 CORAL with the best fit to the data. The N-terminal helix of this model folds back towards the  
1146 core of PfGSK3. (D)  $\chi^2$  values of PfGSK3 structures modelled based on five different  
1147 sequence modifications (WLT, S40E, S42E, S43E and 3SE) compared to SAXS data recorded  
1148 for fractions F1 or F4. The identical models are connected with lines. The size of each points  
1149 correlates with the radius of gyration of the particular model. Three models with lowest  $\chi^2$   
1150 values for each F1 and F4 are colored (see legend). (E)  $\chi^2$  values of the chosen models  
1151 refined with CORAL using different strategies, enabling flexibility at either the N-terminus  
1152 (residues 1-63, strategy A), C-terminus (residues 403-440, strategy C), or at both the C-  
1153 terminus and residues 47-63 (strategy B).  $\chi^2$  values of the original models are shown under  
1154 "O". (F) The SAXS data measured on the PfGSK3 fraction F1 with the fit of theoretical  
1155 scattering calculated from the best fitting model ( $\chi^2=1.19$ ). (G) The SAXS data measured on  
1156 the PfGSK3 fraction F1 with the fit of theoretical scattering calculated from the best fitting  
1157 CORAL-refined model ( $\chi^2=1.06$ ). (H) Graphical summary of the strategies used for model  
1158 refinement against SAXS data using CORAL. The gray box symbolizes that the structure of  
1159 the model was maintained and the zigzag line symbolizes that the structure was replaced with  
1160 disordered residues by CORAL.
